# Supplementary material for: Click 1,2,3-triazole derived fluorescent scaffold by mesoionic carbene–nitrene cyclization: an experimental and theoretical study
Source: Royal Society of Chemistry journal article supplement (doi:10.1039/c8nj04070b), 2018-01-01
Supplement: c8nj04070b1.pdf [file c8nj04070b1.pdf]

## *Electronic Supporting information for:*

Click 1,2,3-triazole derived fluorescent scaffold by mesoionic carbene-nitrene cyclization: an experimental and theoretical study

Khadija Bouchemella, Kévin Fauché, Barkahem Anak\*, Laurent Jouffret, Mustapha Bencharif, Federico Cisnetti\*

### **Contents**

|                                                                                                        |    |
|--------------------------------------------------------------------------------------------------------|----|
| SI 1. Crystal Structure Report for 5a.....                                                             | 1  |
| SI 2. Infrared spectra: experimental and computational data.....                                       | 3  |
| SI 3. Electronic spectra: impact of the dilution on the absorption properties of a solution of 5d..... | 6  |
| SI 4. Additional fluorescence spectra .....                                                            | 7  |
| SI 5. Complete depiction of computational data on emission properties.....                             | 9  |
| SI 6. <sup>1</sup> H and <sup>13</sup> C NMR spectrum of synthesized compounds.....                    | 10 |
| SI 7. xyz coordinates for 5a,b,d .....                                                                 | 22 |

### **SI 1. Crystal Structure Report for 5a**

A specimen of C<sub>16</sub>H<sub>14</sub>N<sub>4</sub>, approximate dimensions 0.057 mm x 0.168 mm x 0.251 mm, was used for the X-ray crystallographic analysis. The X-ray intensity data were measured.

The total exposure time was 39.43 hours. The frames were integrated with the Bruker SAINT software package using a narrow-frame algorithm. The integration of the data using a monoclinic unit cell yielded a total of 116902 reflections to a maximum  $\theta$  angle of 34.53° (0.63 Å resolution), of which 5211 were independent (average redundancy 22.434, completeness = 93.7%,  $R_{\text{int}} = 8.74\%$ ,  $R_{\text{sig}} = 6.36\%$ ) and 2938 (56.38%) were greater than  $2\sigma(F^2)$ . The final cell constants of  $a = 16.3021(12)$  Å,  $b = 8.0165(6)$  Å,  $c = 20.5586(14)$  Å,  $\beta = 103.284(4)^\circ$ , volume = 2614.8(3) Å<sup>3</sup>, are based upon the refinement of the XYZ-centroids of 9642 reflections above  $20 \sigma(I)$  with  $5.774^\circ < 2\theta < 45.56^\circ$ . Data were corrected for absorption effects using the Numerical Mu From Formula method (SADABS). The ratio of minimum to maximum apparent transmission was 0.944. The calculated minimum and maximum transmission coefficients (based on crystal size) are 0.9790 and 0.9950.

The final anisotropic full-matrix least-squares refinement on  $F^2$  with 182 variables converged at  $R1 = 5.01\%$ , for the observed data and  $wR2 = 12.90\%$  for all data. The goodness-of-fit was 1.002. The largest peak in the final difference electron density synthesis was  $0.249 e^-/\text{Å}^3$  and the largest hole was  $-0.239 e^-/\text{Å}^3$  with an RMS deviation of  $0.049 e^-/\text{Å}^3$ . On the basis of the final model, the calculated density was 1.333 g/cm<sup>3</sup> and  $F(000)$ , 1104 e<sup>-</sup>.

**Table S1.** Sample and crystal data for **5a**.

|                        |                                                                                         |
|------------------------|-----------------------------------------------------------------------------------------|
| Chemical formula       | C <sub>16</sub> H <sub>14</sub> N <sub>4</sub>                                          |
| Formula weight         | 262.31 g/mol                                                                            |
| Temperature            | 293(2) K                                                                                |
| Wavelength             | 0.71073 Å                                                                               |
| Crystal size           | 0.057 x 0.168 x 0.251 mm                                                                |
| Crystal system         | monoclinic                                                                              |
| Space group            | C 1 2/c 1                                                                               |
| Unit cell dimensions   | a = 16.3021(12) Å<br>b = 8.0165(6) Å    α = 90°<br>c = 20.5586(14) Å    β = 103.284(4)° |
| Volume                 | 2614.8(3) Å <sup>3</sup> γ = 90°                                                        |
| Z                      | 8                                                                                       |
| Density (calculated)   | 1.333 g/cm <sup>3</sup>                                                                 |
| Absorption coefficient | 0.083 mm <sup>-1</sup>                                                                  |
| F(000)                 | 1104                                                                                    |

**Table S2.** Data collection and structure refinement for **5a**

|                                     |                                                                                                                                                               |
|-------------------------------------|---------------------------------------------------------------------------------------------------------------------------------------------------------------|
| Theta range for data collection     | 3.63 to 34.53°                                                                                                                                                |
| Index ranges                        | -25<=h<=25, -12<=k<=12, -31<=l<=31                                                                                                                            |
| Reflections collected               | 116902                                                                                                                                                        |
| Independent reflections             | 5211 [R(int) = 0.0874]                                                                                                                                        |
| Coverage of independent reflections | 93.7%                                                                                                                                                         |
| Absorption correction               | Numerical Mu From Formula                                                                                                                                     |
| Max. and min. transmission          | 0.9950 and 0.9790                                                                                                                                             |
| Refinement method                   | Full-matrix least-squares on F <sup>2</sup>                                                                                                                   |
| Refinement program                  | SHELXL-2014/7 (Sheldrick, 2014)                                                                                                                               |
| Function minimized                  | Σ w(F <sub>o</sub> <sup>2</sup> - F <sub>c</sub> <sup>2</sup> ) <sup>2</sup>                                                                                  |
| Data / restraints / parameters      | 5211 / 0 / 182                                                                                                                                                |
| Goodness-of-fit on F <sup>2</sup>   | 1.002                                                                                                                                                         |
| Final R indices                     | 2938 data; I>2σ(I) R1 = 0.0501, wR2 = 0.1030<br>all data                    R1 = 0.1235, wR2 = 0.1290                                                         |
| Weighting scheme                    | w=1/[σ <sup>2</sup> (F <sub>o</sub> <sup>2</sup> )+(0.0519P) <sup>2</sup> +1.1356P]<br>where P=(F <sub>o</sub> <sup>2</sup> +2F <sub>c</sub> <sup>2</sup> )/3 |
| Largest diff. peak and hole         | 0.249 and -0.239 eÅ <sup>-3</sup>                                                                                                                             |
| R.M.S. deviation from mean          | 0.049 eÅ <sup>-3</sup>                                                                                                                                        |

The packing of **5a** in the solid phase is depicted hereafter. Besides bond distances and angles described in the main text, the crystallographic analysis reveals that the crystal packing relies on short p-p contacts between equivalent molecules of **5a**. In particular, there is a rather short

separation (3.377 Å) between the centroids of 1,2,3-triazole ring of a molecule and the imidazole ring of its neighbor.

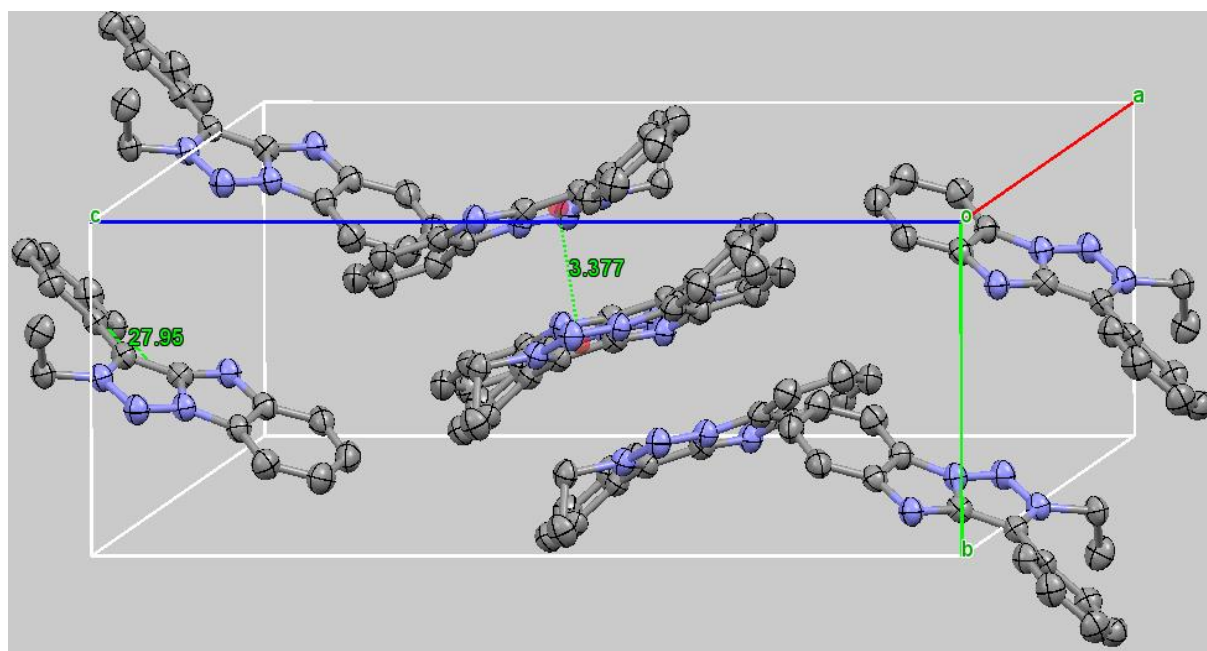

**Fig. S1** view of the packing in the X-ray crystal structure of **5a**. Hydrogen atoms omitted for the sake of clarity.

## SI 2. *Computation of the infrared spectra of 5a,b,d*

The FT-IR of the three compounds were recorded in the wavenumber region of 4000-700  $\text{cm}^{-1}$ . The experimental and calculated IR spectra of **5a**, **5b** and **5d** are shown in Fig. S2. The analysis for modes of vibration with B3LYP level is mentioned in Table S3. None of the predicted vibrational spectra have any imaginary frequency prove that optimized geometry is located at the lowest point on the potential energy surface. The calculated values are globally in good agreement with the experimental data. The wavenumbers for  $\nu(\text{C-H})$  aromatic stretching has been calculated at 3205, 3206 and 3209  $\text{cm}^{-1}$  for **5a**, **5b** and **5d** respectively in good agreement with the experimental. The  $\nu(\text{C-H})$  alkyl stretching vibrations of the three compounds appearing as a broadened and intense peak in the range of 3052-3128  $\text{cm}^{-1}$ . The wavenumber for  $\nu(\text{C-H})_{\text{pr-alc}}$  was computed at 2991  $\text{cm}^{-1}$  for **5d**. The peak at 1533, 1584 and 1593  $\text{cm}^{-1}$  are due to  $\nu(\text{C-C})$  stretching vibrations of phenyl ring for **5a**, **5b** and **5d** respectively and of heteroaromatic ring for **5d**. The B3LYP method with 6-31+G (d,p) basis set has good ability to predict the IR spectra of the set of compounds.

**Table S3** Experimental and calculated vibrational frequencies ( $\text{cm}^{-1}$ ) with B3LYP level for **5a**, **5b** and **5d**.

|           | Vibrational wavenumbers ( $\text{cm}^{-1}$ ) |                         | Assignments                                                                                            |
|-----------|----------------------------------------------|-------------------------|--------------------------------------------------------------------------------------------------------|
|           | Experimental                                 | B3LYP/<br>6-31G+ (d, p) |                                                                                                        |
| <b>5a</b> | 739                                          | 744                     | $\delta\text{C-H}_{\text{Ph}}$ (wag)                                                                   |
|           | 1215                                         | 1242                    | $\nu_{\text{as}}\text{C-N}$ , $\beta\text{C-H}_{\text{Ph}}$                                            |
|           | 1393                                         | 1431                    | $\nu_{\text{s}}\text{C-N}$ , $\beta\text{C-H}_{\text{Ph}}$ , $\beta\text{NNC}$ (scis)                  |
|           | 1442                                         | 1472                    | $\nu_{\text{s}}\text{C-C}$                                                                             |
|           | 1585                                         | 1593                    | $\nu_{\text{as}}\text{Ring}_{\text{Ph}}$ , $\nu_{\text{as}}\text{C-N}$ , $\beta\text{C-H}_{\text{Ph}}$ |
|           | 2984                                         | 3052                    | $\nu_{\text{s}}\text{C-H}_{\text{alk}}$                                                                |
|           | -                                            | 3126                    | $\nu_{\text{s}}\text{C-H}_{\text{alk}}$                                                                |
|           | -                                            | 3205                    | $\nu_{\text{as}}\text{C-H}_{\text{Ph}}$                                                                |
| <b>5b</b> | 759                                          | 769                     | $\delta\text{C-H}_{\text{Ph}}$ (wag)                                                                   |
|           | 1220                                         | 1241                    | $\nu_{\text{as}}\text{C-N}$ , $\beta\text{C-H}_{\text{Ph}}$                                            |
|           | 1394                                         | 1381                    | $\nu_{\text{s}}\text{C-N}$ , $\beta\text{C-H}_{\text{Ph}}$                                             |
|           | 1425                                         | 1430                    | $\nu_{\text{s}}\text{C-N}$ , $\beta\text{C-H}_{\text{Ph}}$ , $\beta\text{NNC}$ (scis)                  |
|           | 1581                                         | 1584                    | $\nu_{\text{as}}\text{Ring}_{\text{Ph}}$ , $\nu_{\text{as}}\text{C-N}$ , $\beta\text{C-H}_{\text{Ph}}$ |
|           | 2979                                         | 3053                    | $\nu_{\text{s}}\text{C-H}_{\text{alk}}$                                                                |
|           | -                                            | 3126                    | $\nu_{\text{s}}\text{C-H}_{\text{alk}}$                                                                |
|           | -                                            | 3206                    | $\nu_{\text{as}}\text{C-H}_{\text{Ph}}$                                                                |
| <b>5d</b> | 739                                          | 744                     | $\delta\text{C-H}_{\text{Ph}}$ (wag)                                                                   |
|           | 1220                                         | 1234                    | $\nu_{\text{as}}\text{C-N}$ , $\beta\text{C-H}_{\text{Ph}}$                                            |
|           | 1393                                         | 1385                    | $\nu_{\text{s}}\text{C-N}$ , $\beta\text{C-H}_{\text{Ph}}$ , $\beta\text{NNC}$ (scis)                  |
|           | 1425                                         | 1476                    | $\nu_{\text{s}}\text{C-C}$ , $\beta\text{C-H}_{\text{Ph}}$                                             |
|           | 1540                                         | 1533                    | $\nu_{\text{as}}\text{Ring}_{\text{Ph}}$ , $\nu_{\text{as}}\text{C-N}$ , $\beta\text{C-H}_{\text{Ph}}$ |
|           | 2927                                         | 2991                    | $\nu_{\text{s}}\text{C-H}_{\text{pr-alc}}$                                                             |
|           | -                                            | 3055                    | $\nu_{\text{s}}\text{C-H}_{\text{alk}}$                                                                |
|           | -                                            | 3128                    | $\nu_{\text{as}}\text{C-H}_{\text{alk}}$                                                               |
|           | 3215                                         | 3209                    | $\nu_{\text{as}}\text{C-H}_{\text{Ph}}$                                                                |

v: stretching,  $\beta$ : in plane bending,  $\delta$  out of plane bending, s:symmetric, as:asymmytric, Ph : phenyl, Alk: alkyne,pr-alc: primary alcohol, wag : wagging, scis : scissoring

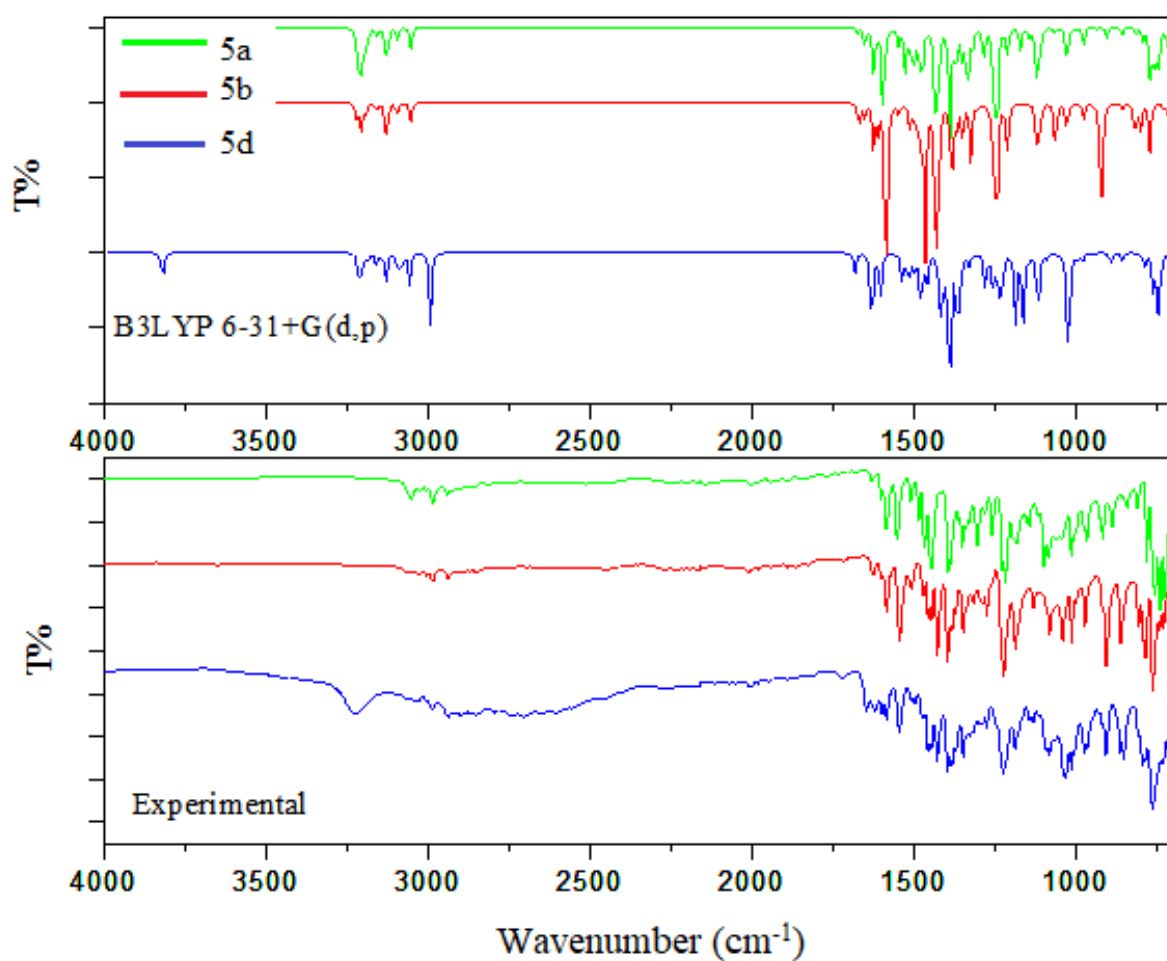

**Fig. S2.** Experimental and calculated FT-IR spectra with B3LYP level in the range 4000–700cm<sup>-1</sup> of **5a**, **5b** and **5d** .

**SI 3. Electronic spectra: impact of the dilution on the absorption properties of a solution of 5d**

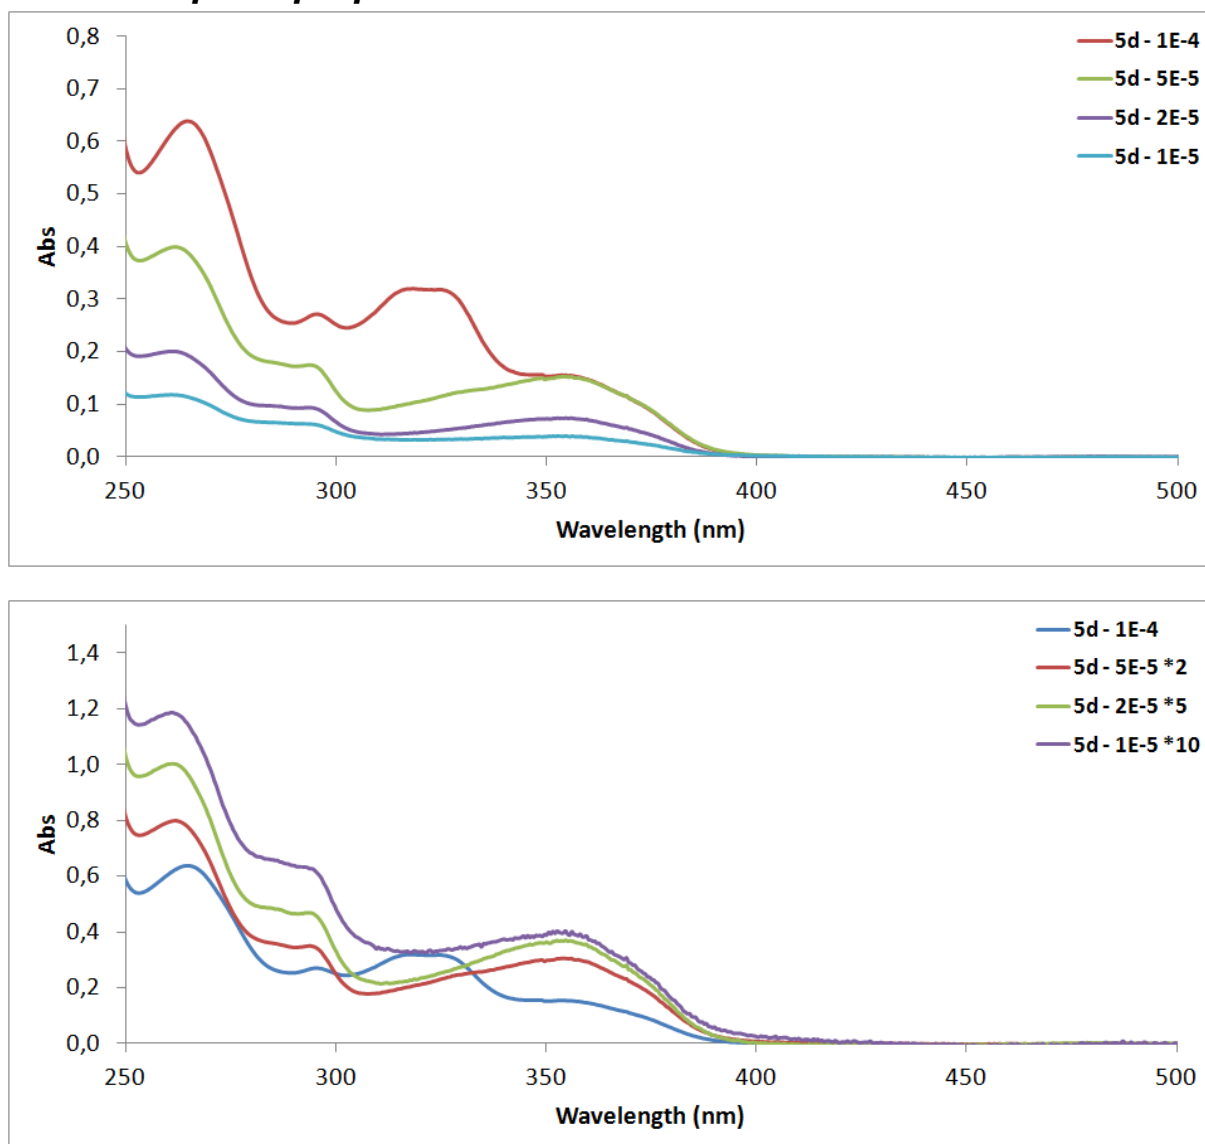

**Fig. S3** Experimental spectra recorded upon dilution of a solution of **5d** in methanol. Top: raw data, bottom: data multiplied by the dilution factor. Concentration in mol L<sup>-1</sup> given for each spectra within the figures.

**SI 4. Additional fluorescence spectra of 5a,b,d**

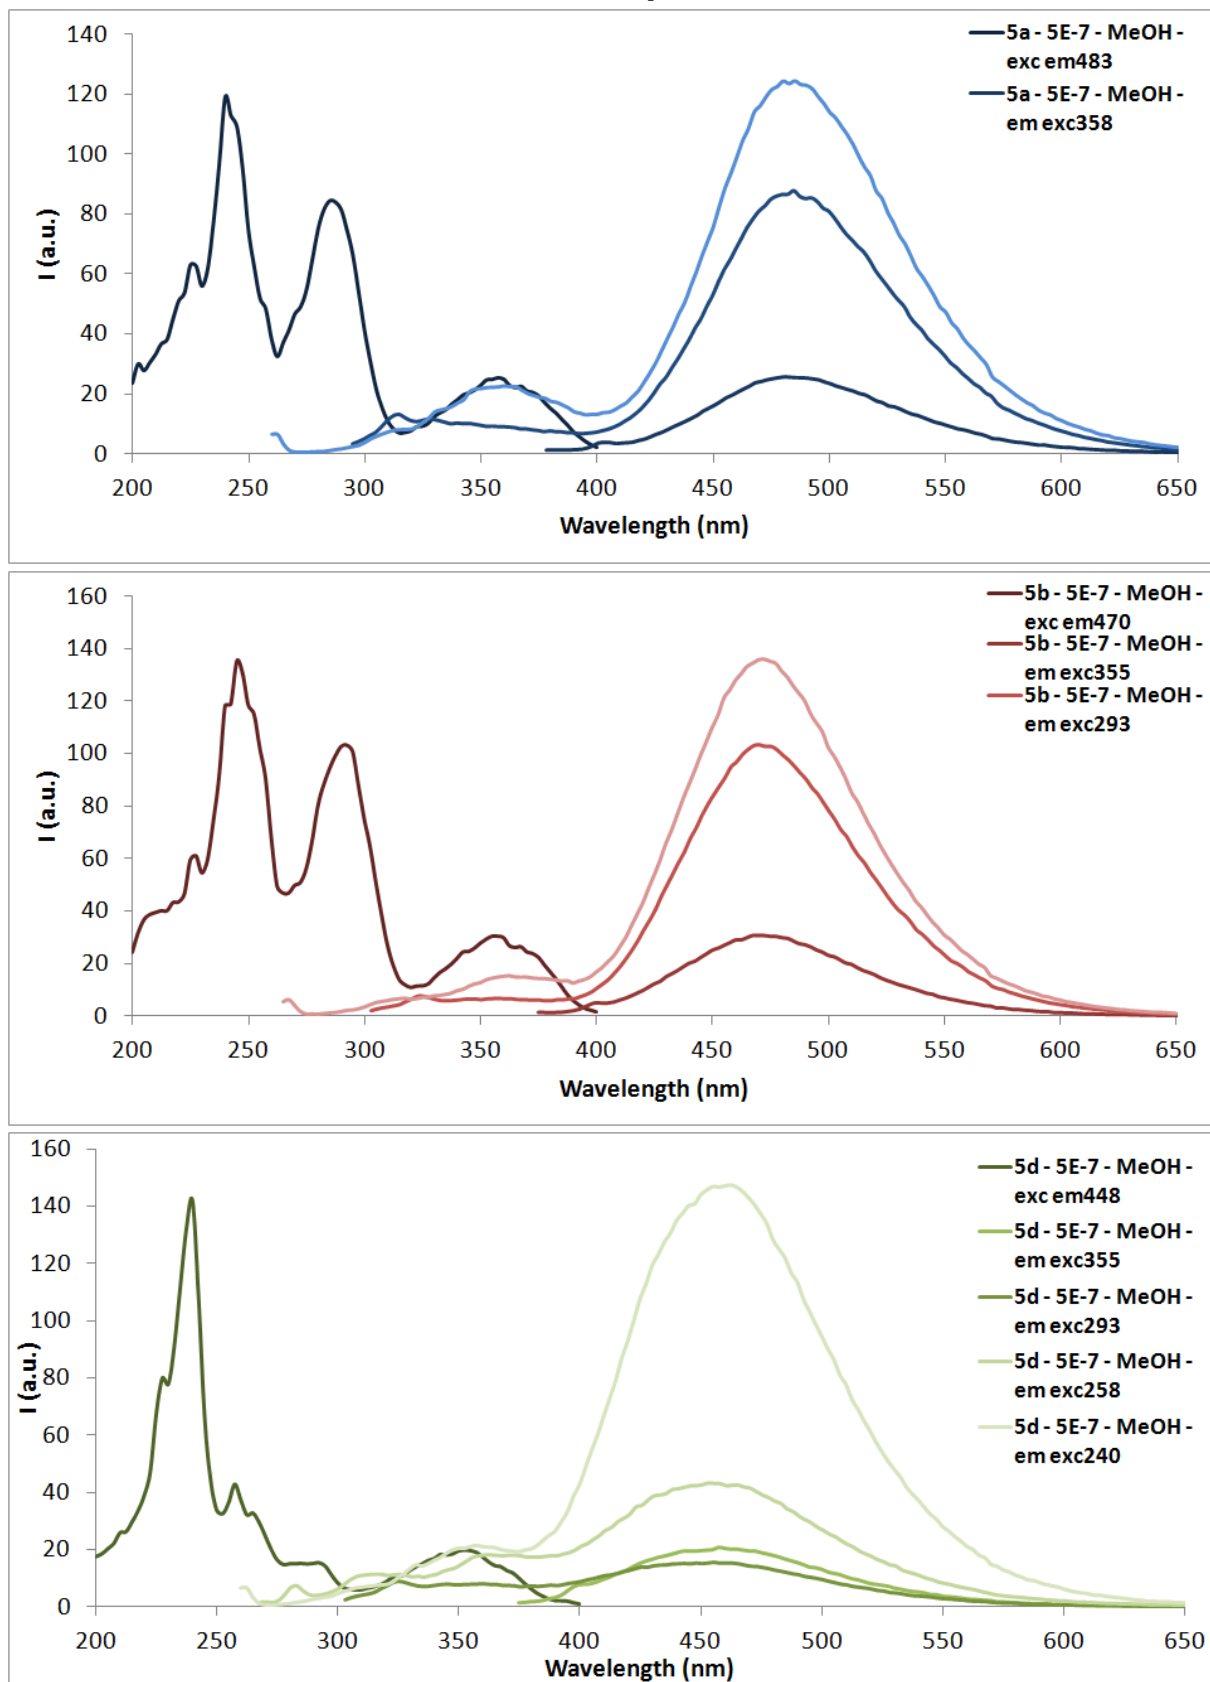

**Fig. S4** Supplementary fluorescence spectra of **5a,b,d**. Excitation (exc) spectra at a fixed emission wavelength or emission (em) spectra at a fixed excitation wavelength.

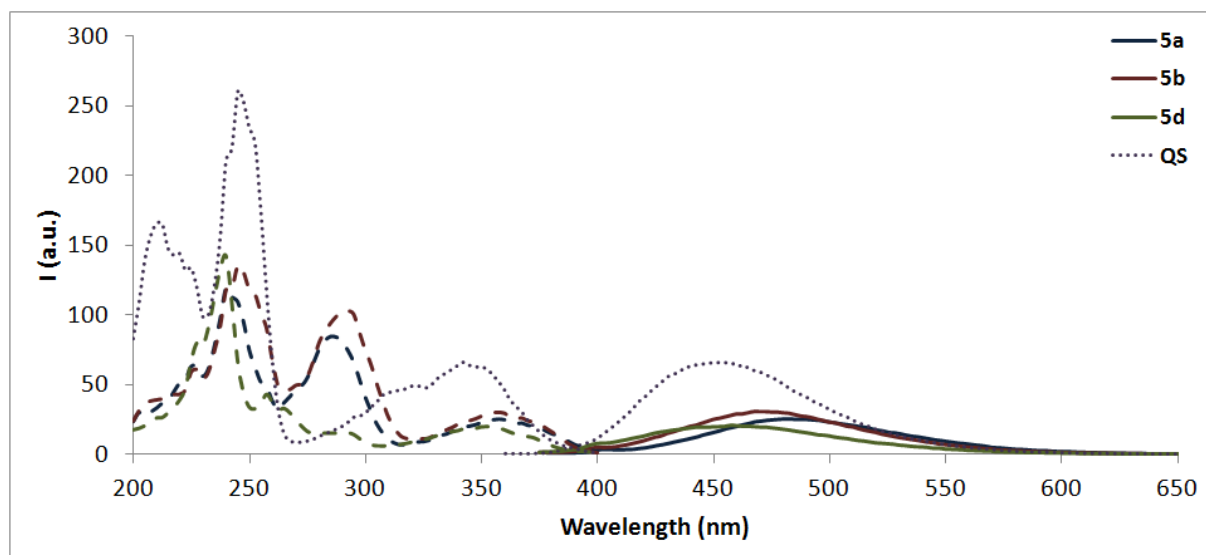

**Fig. S5** Experimental fluorescence spectra of **5a**, **5b** and **5d** compounds in methanol. Excitation spectra (dashed) recorded for maximum emission wavelengths. Emission spectra (plain) recorded for maximum excitation wavelengths (Table 3). Concentration:  $5 \times 10^{-7}$  mol  $L^{-1}$  superimposed to quinine excitation and emission spectra (dotted) recorded in 0.5 M  $H_2SO_4$  for quantum yield determination with the same instrumental parameters.



**SI 5. Complete depiction of computational data on emission properties**

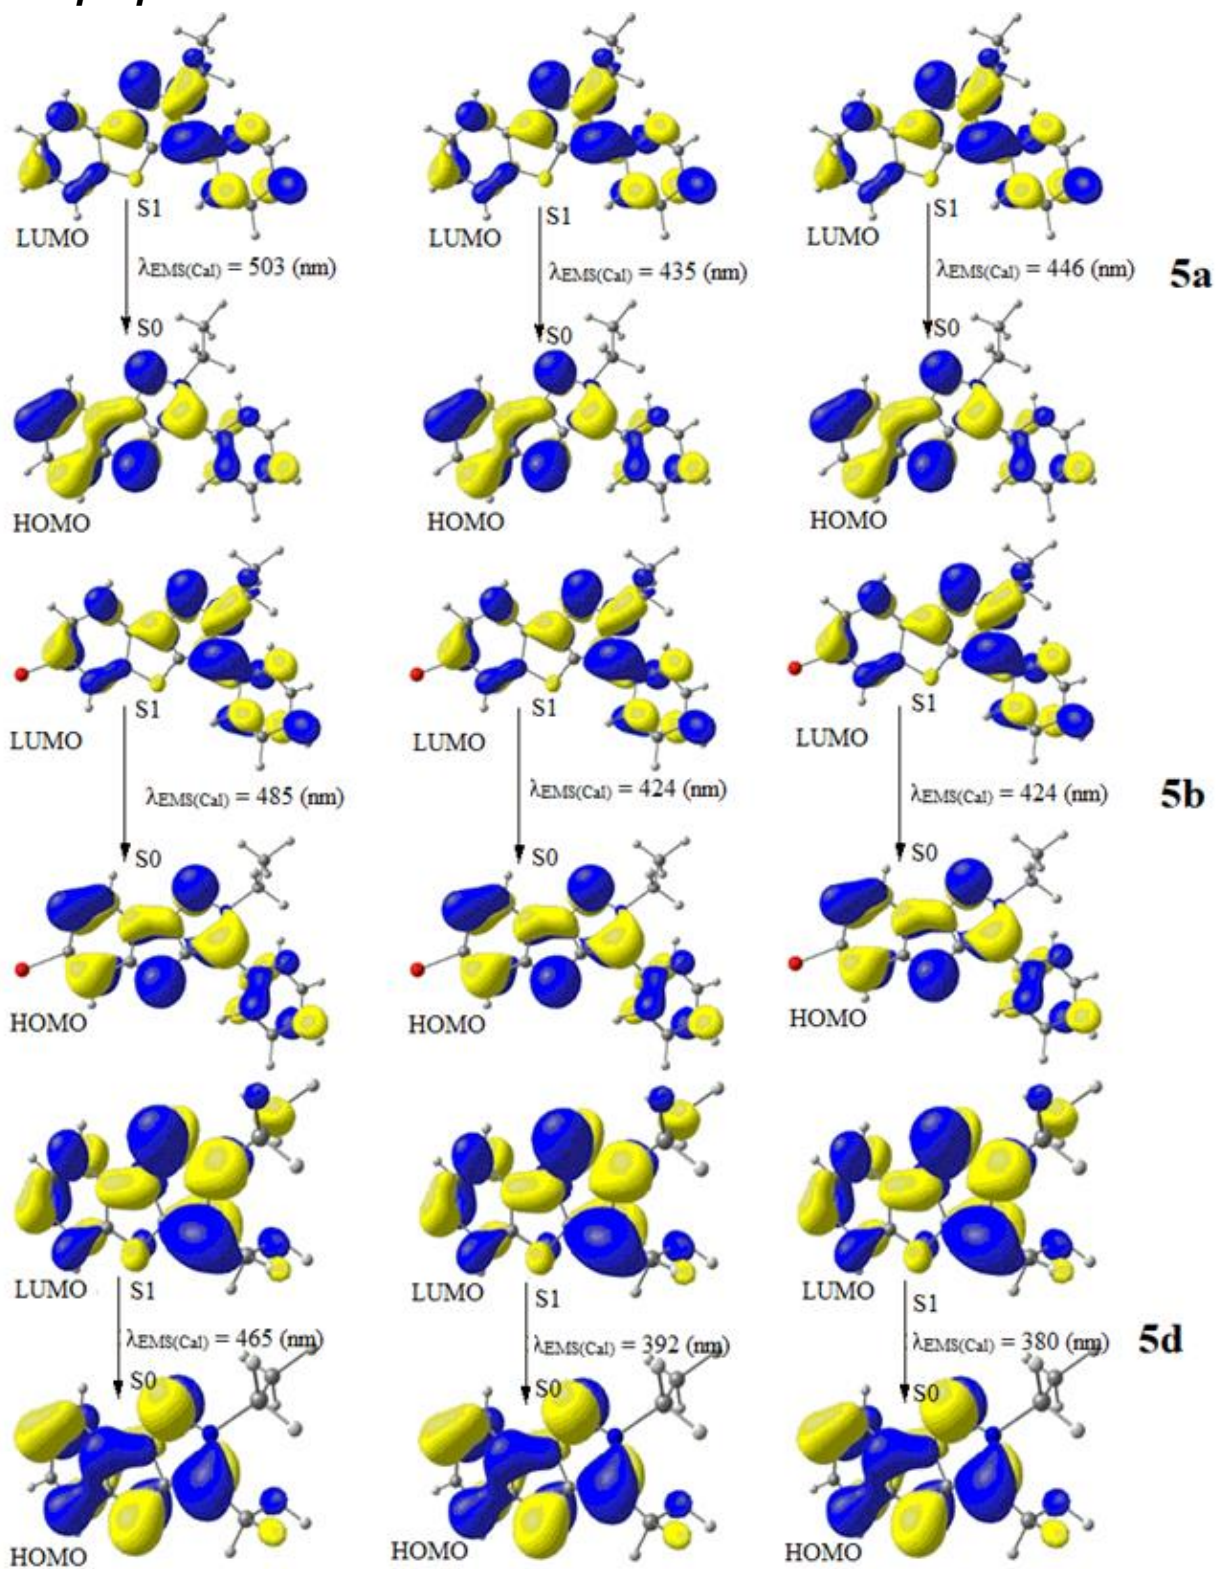

**Fig. S6** Difference density for the emission of **5a**, **5b** and **5d** compounds by the TD-DFT method

SI 6.  $^1\text{H}$  and  $^{13}\text{C}$  NMR spectrum of synthesized compounds

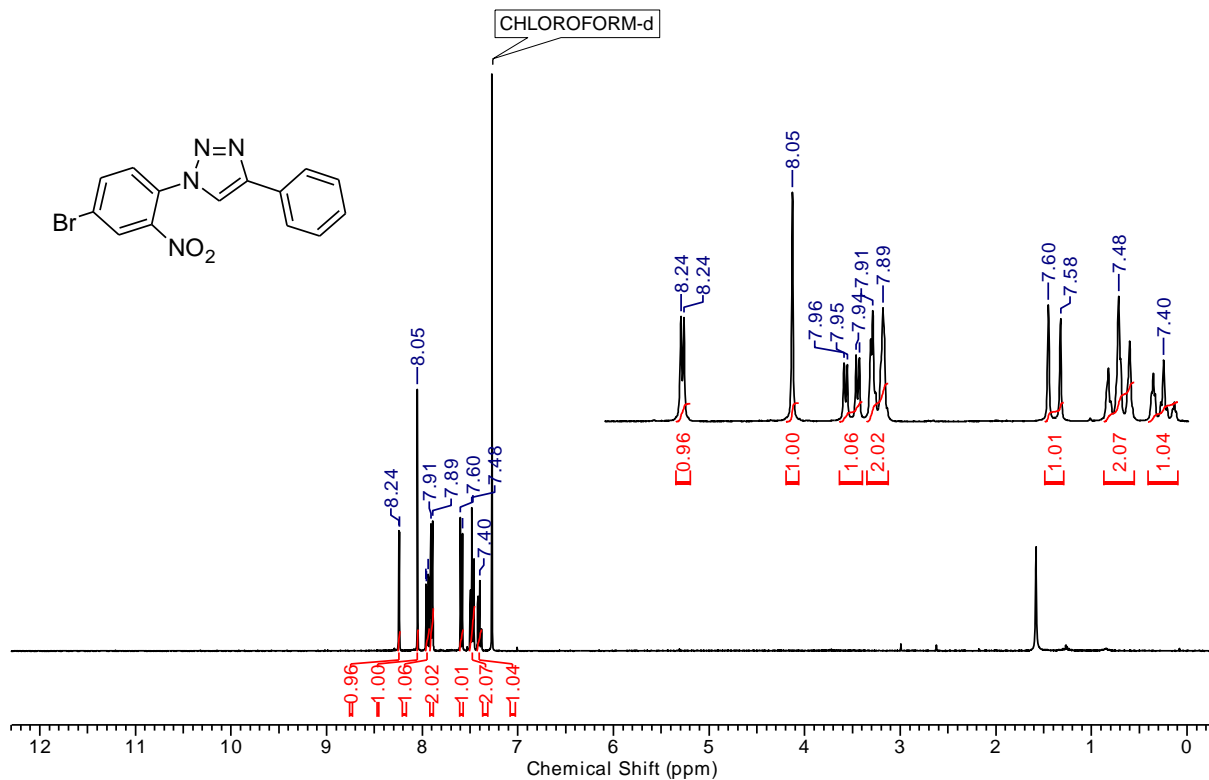

Fig. S7  $^1\text{H}$  NMR spectrum of **1b**

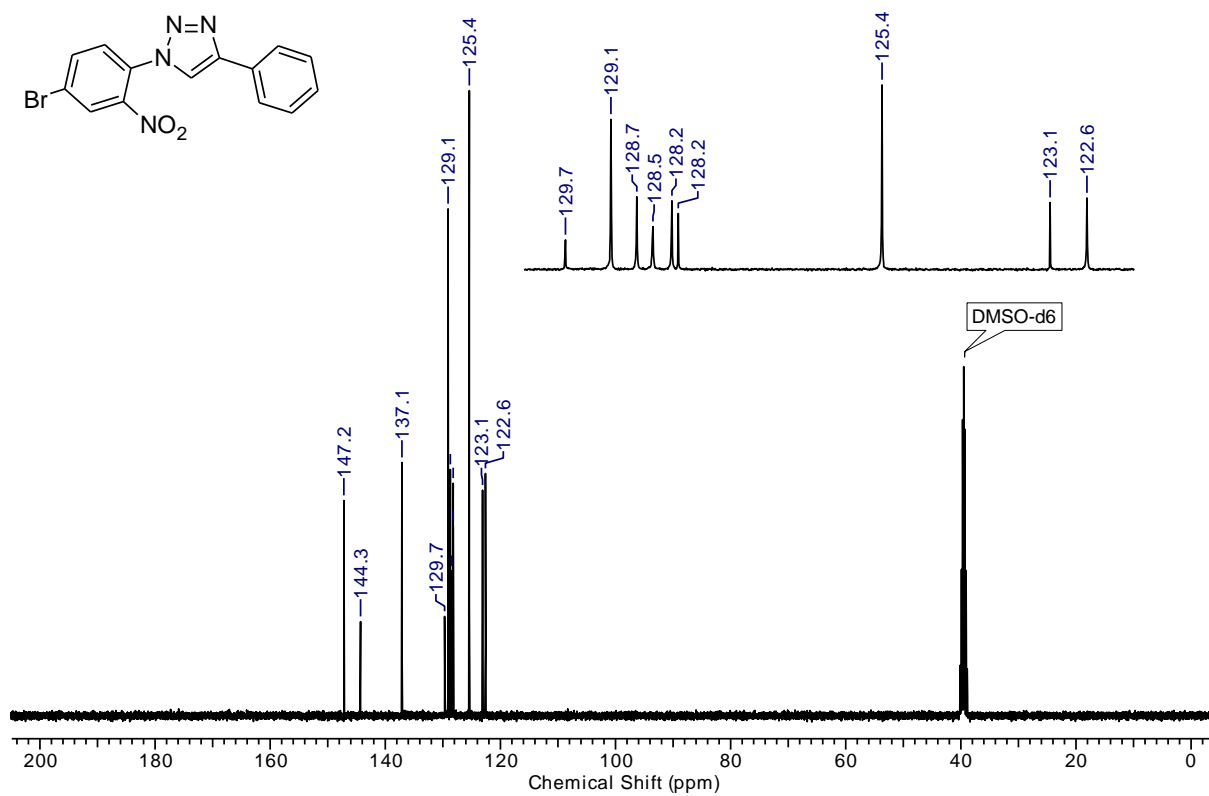

Fig. S8  $^{13}\text{C}$  NMR spectrum of **1b**

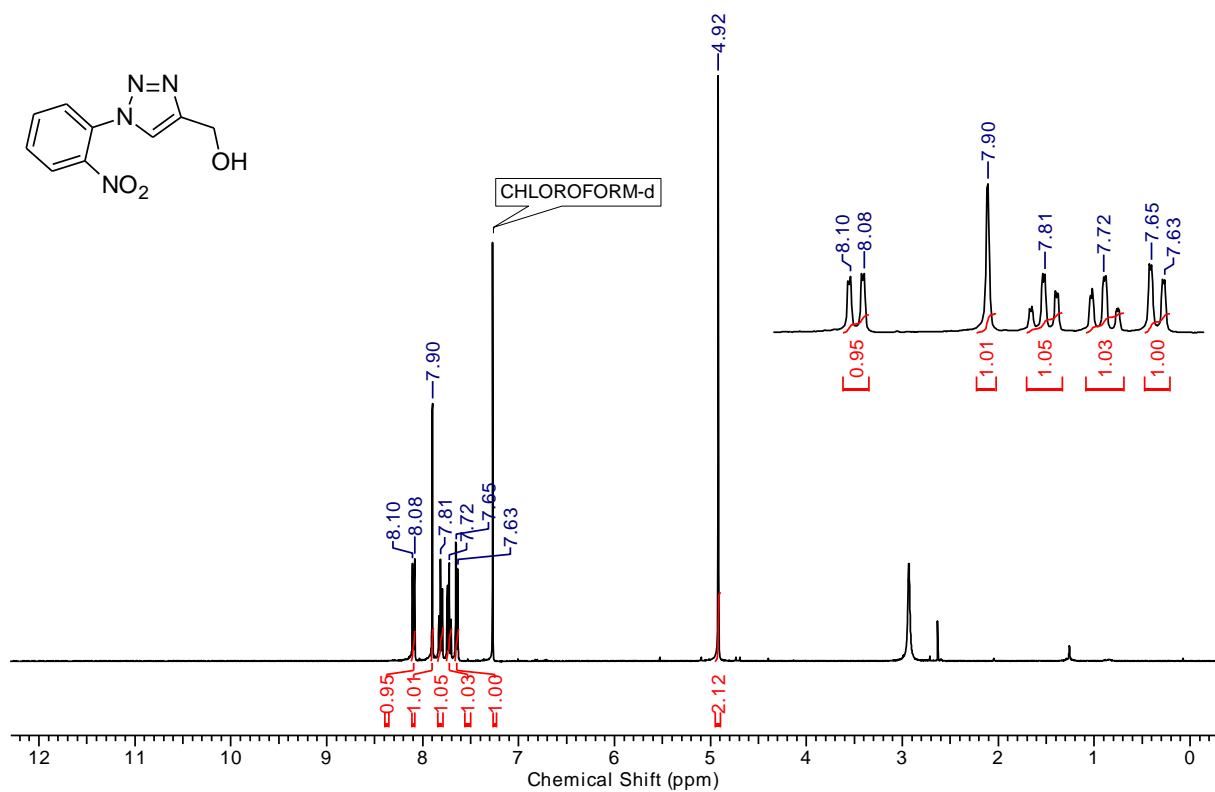

**Fig. S9** <sup>1</sup>H NMR spectrum of **1d**

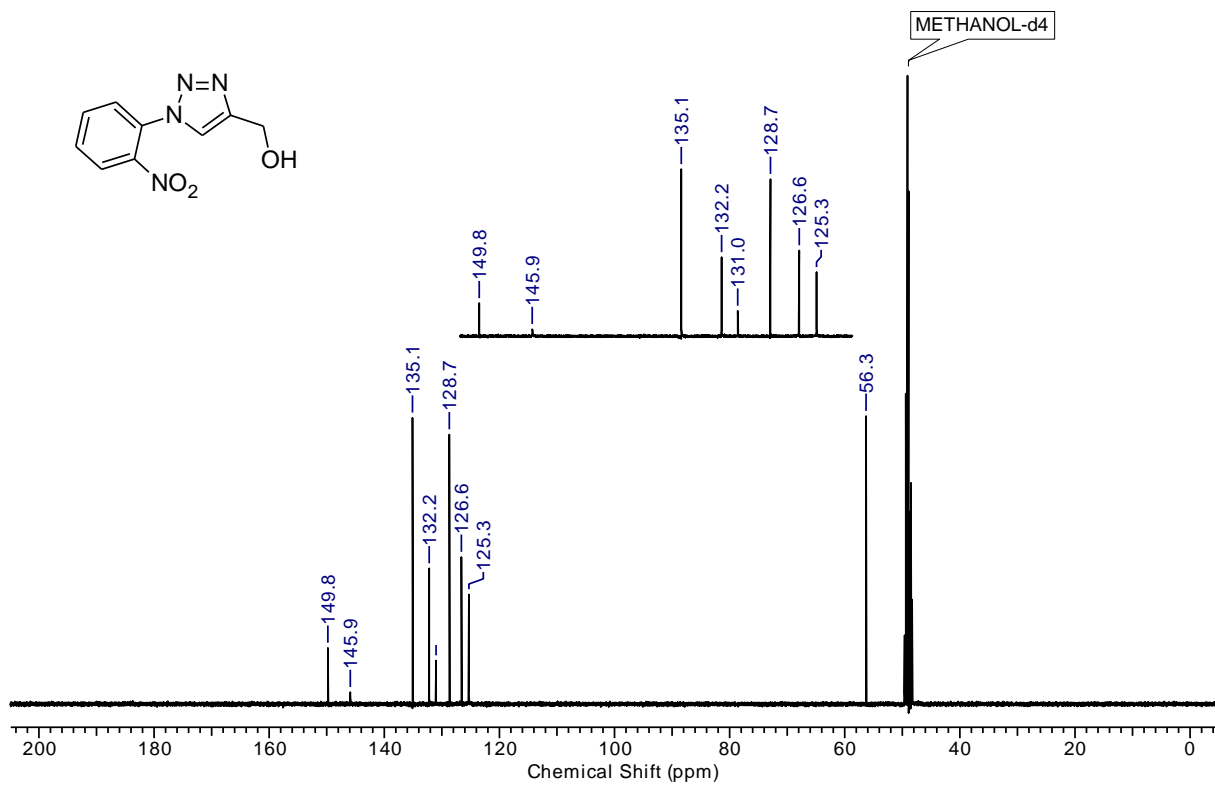

**Fig. S10** <sup>13</sup>C NMR spectrum of **1d**

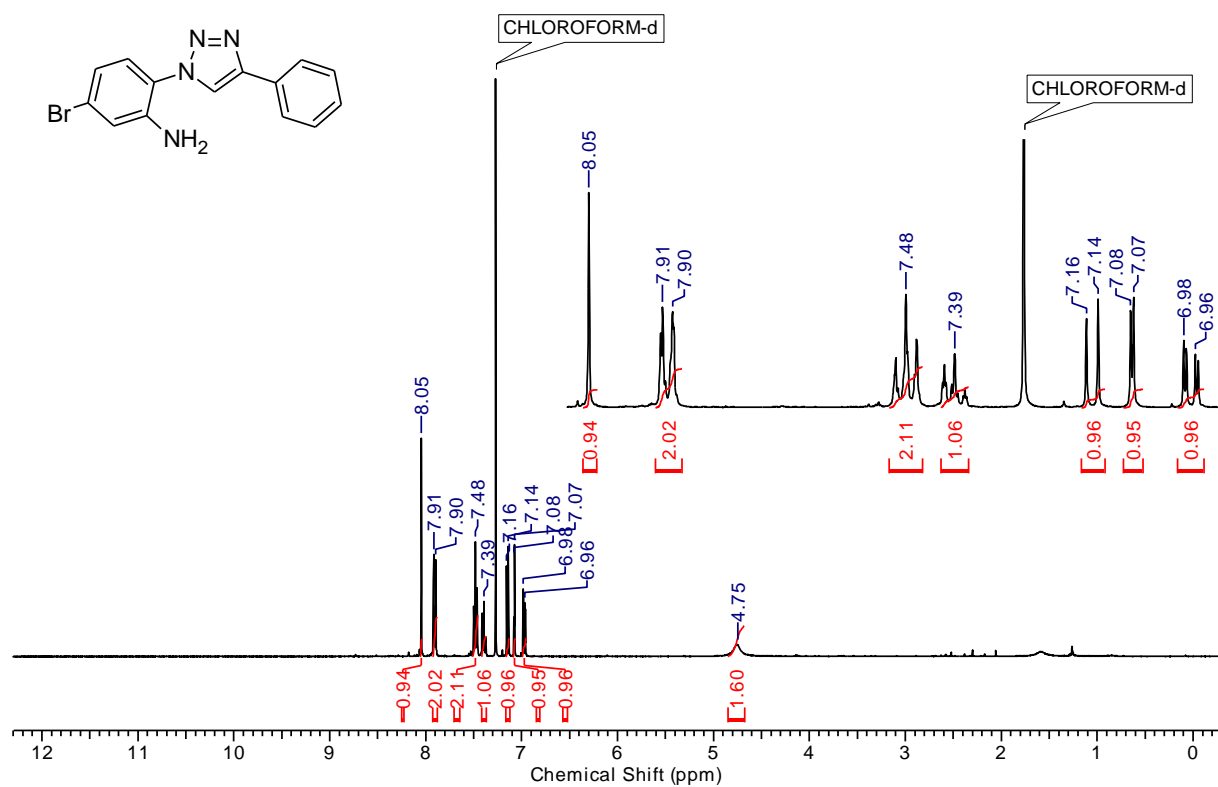

Fig. S11 <sup>1</sup>H NMR spectrum of **2b**

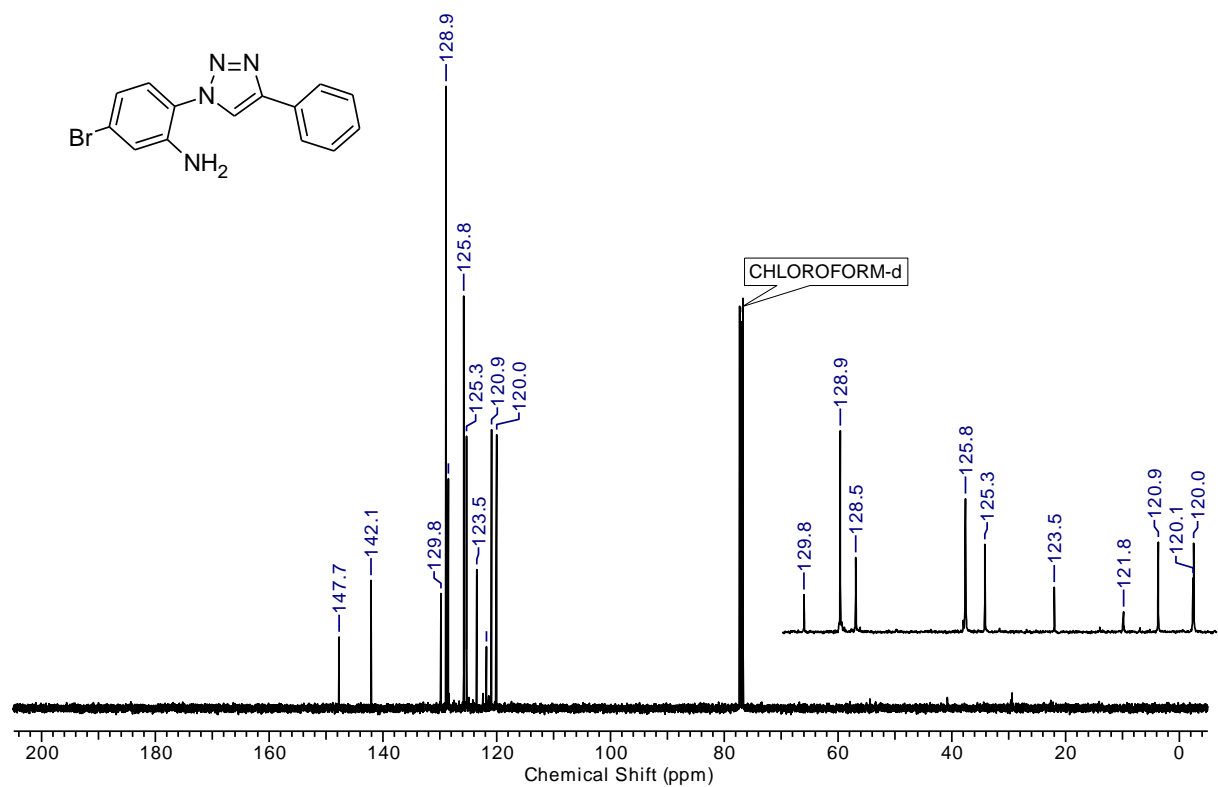

Fig. S12 <sup>13</sup>C NMR spectrum of **2b**

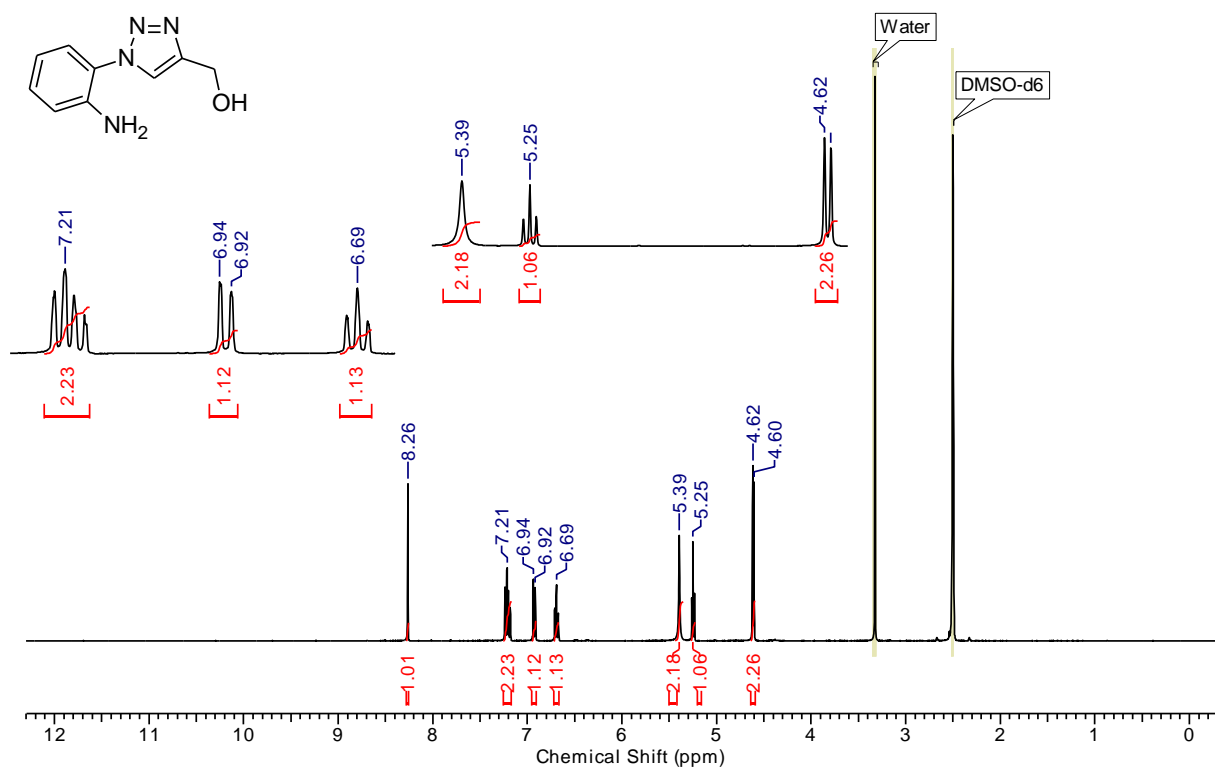

**Fig. S13**  $^1\text{H NMR}$  spectrum of **2d**

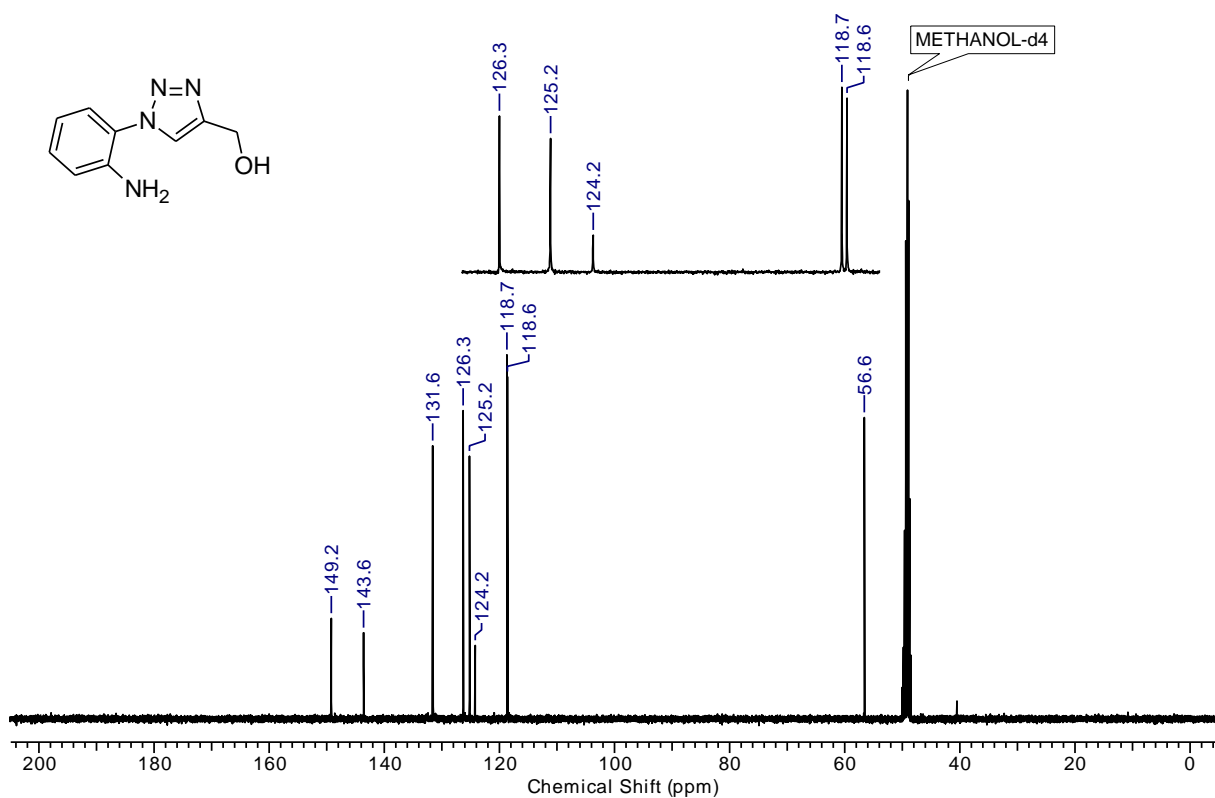

**Fig. S14**  $^{13}\text{C NMR}$  spectrum of **2d**

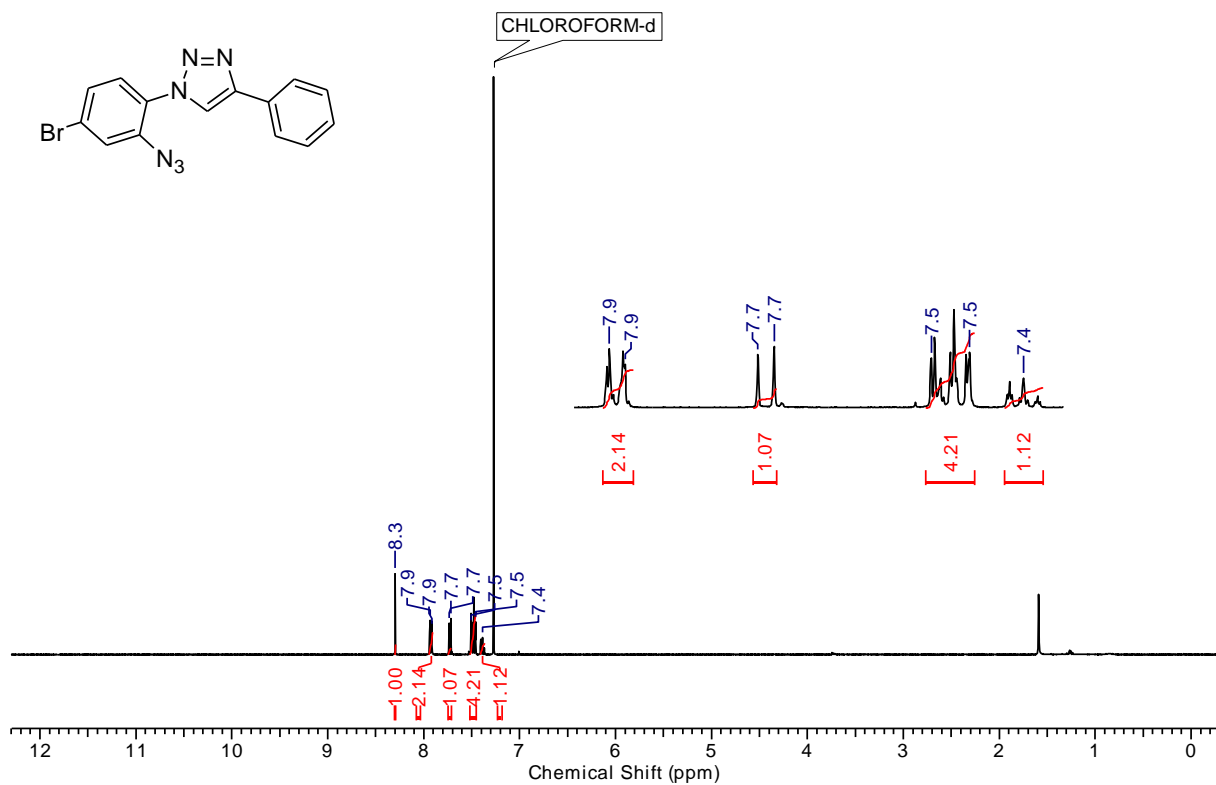

**Fig. S15** <sup>1</sup>H NMR spectrum of **3b**

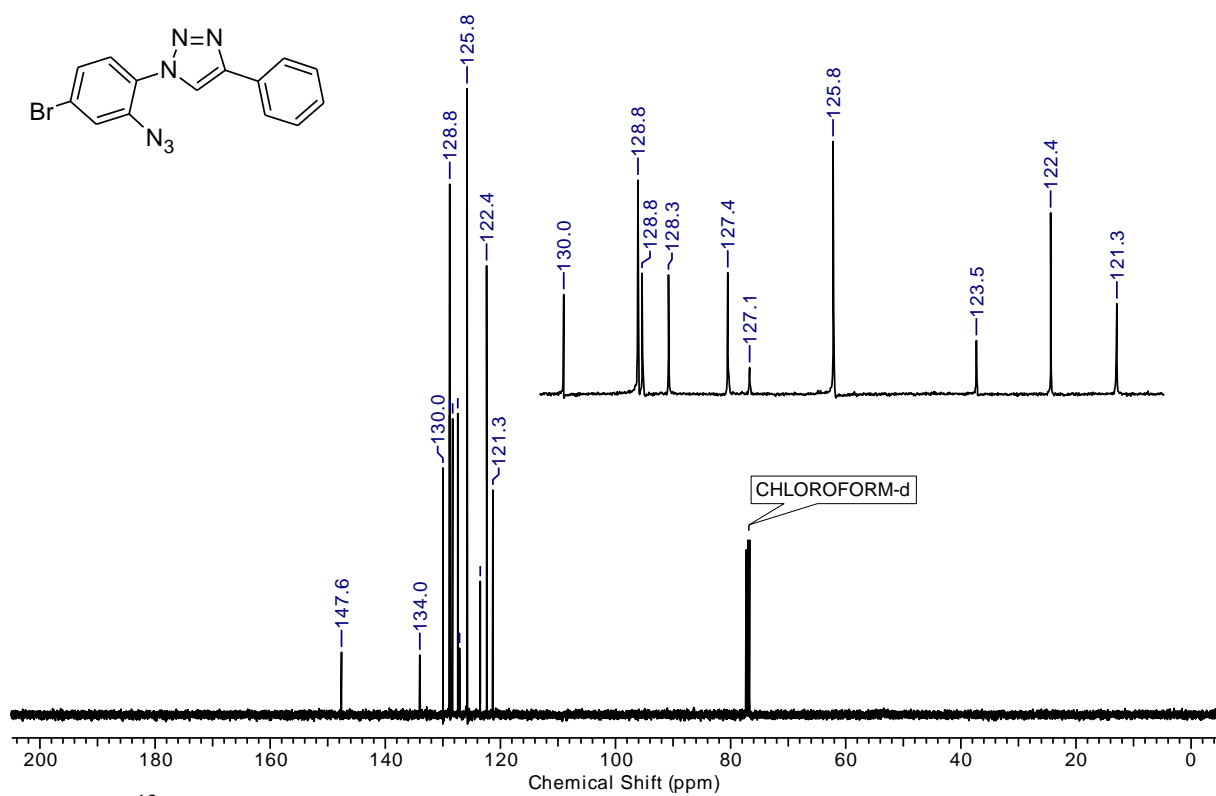

**Fig. S16** <sup>13</sup>C NMR spectrum of **3b**

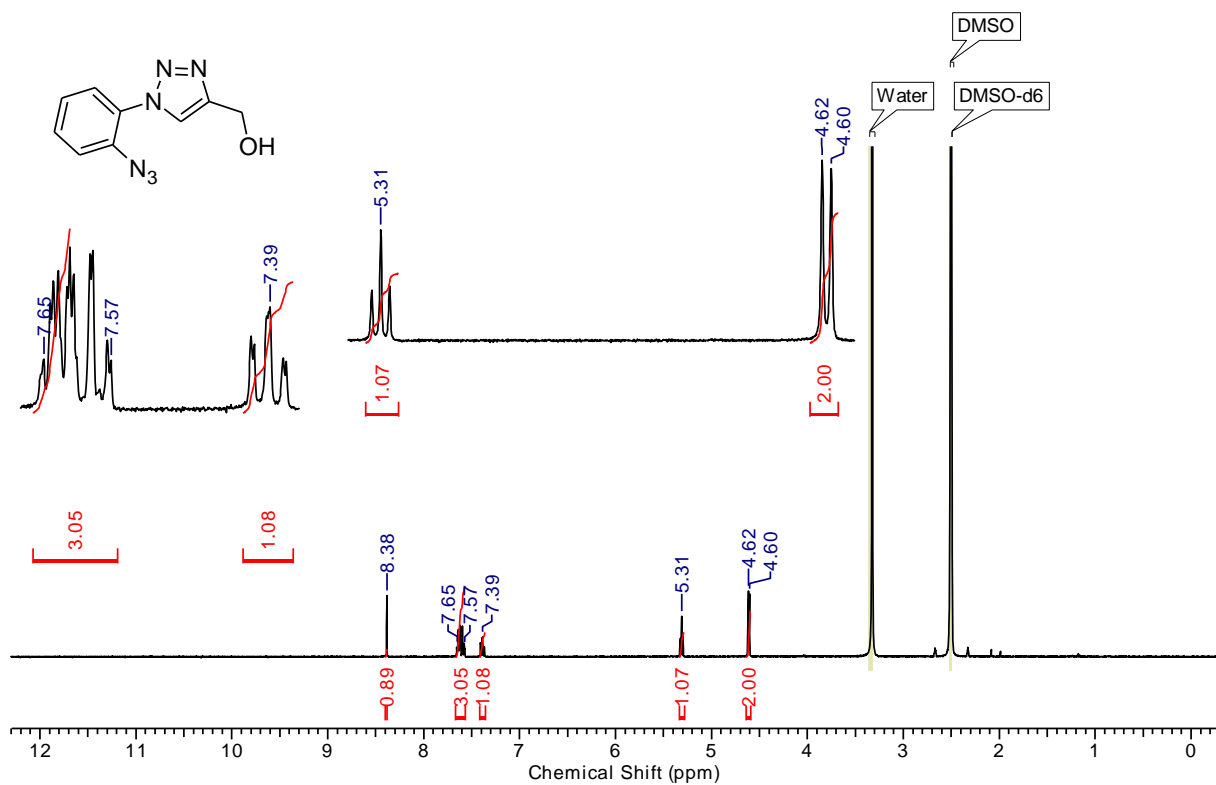

**Fig. S17**  $^1\text{H}$  NMR spectrum of **3d**

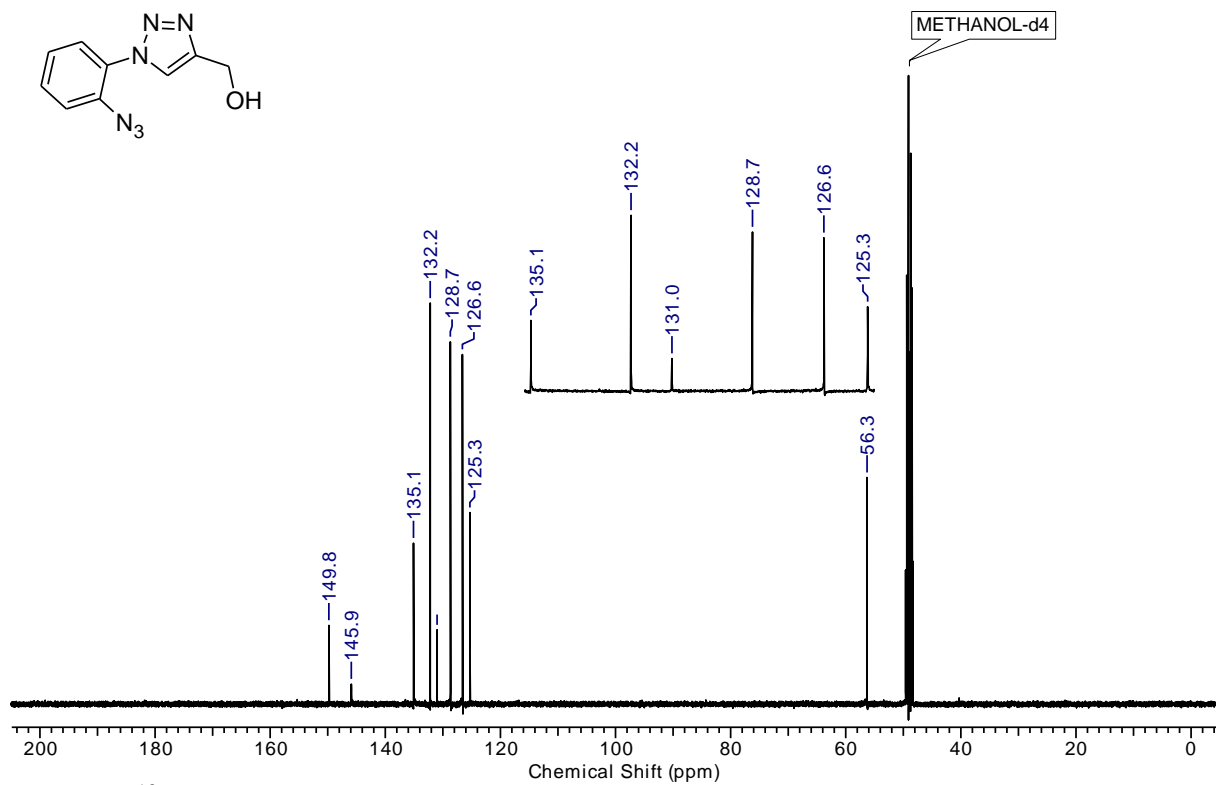

**Fig. S18**  $^{13}\text{C}$  NMR spectrum of **3d**

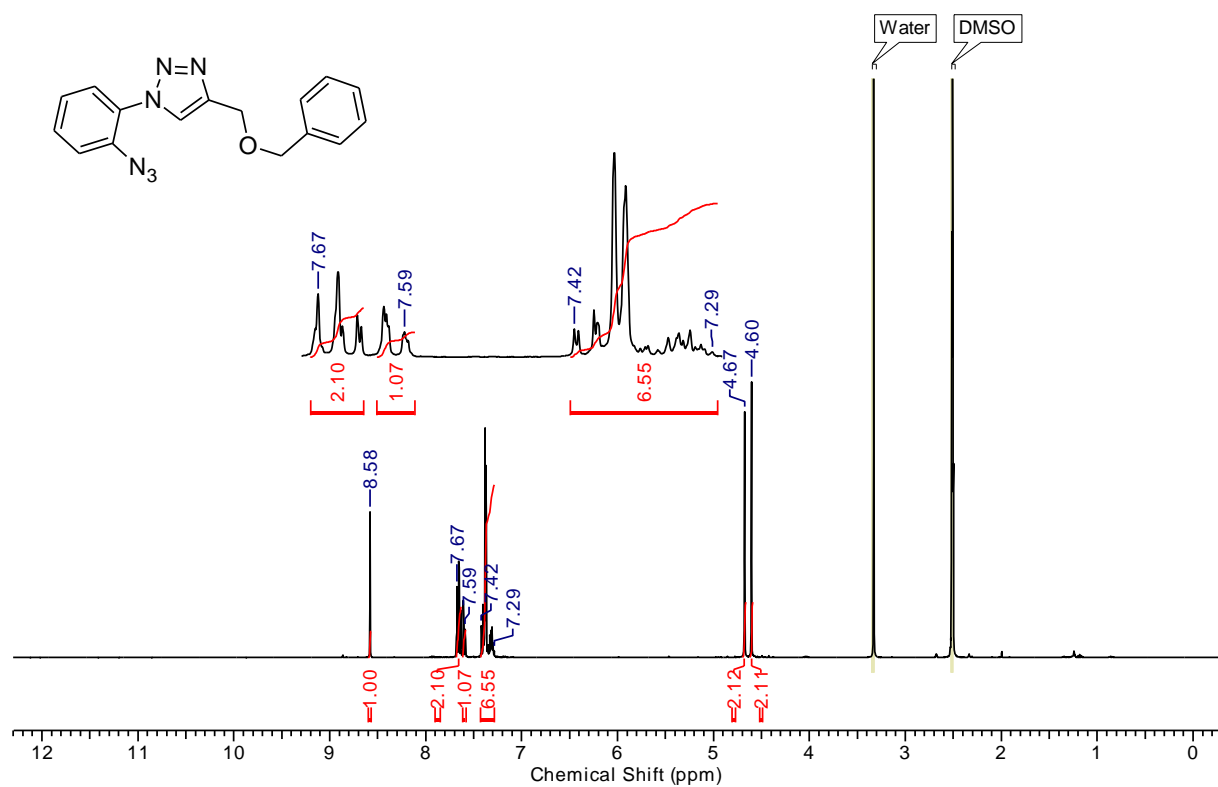

Fig. S19 <sup>1</sup>H NMR spectrum of 3c

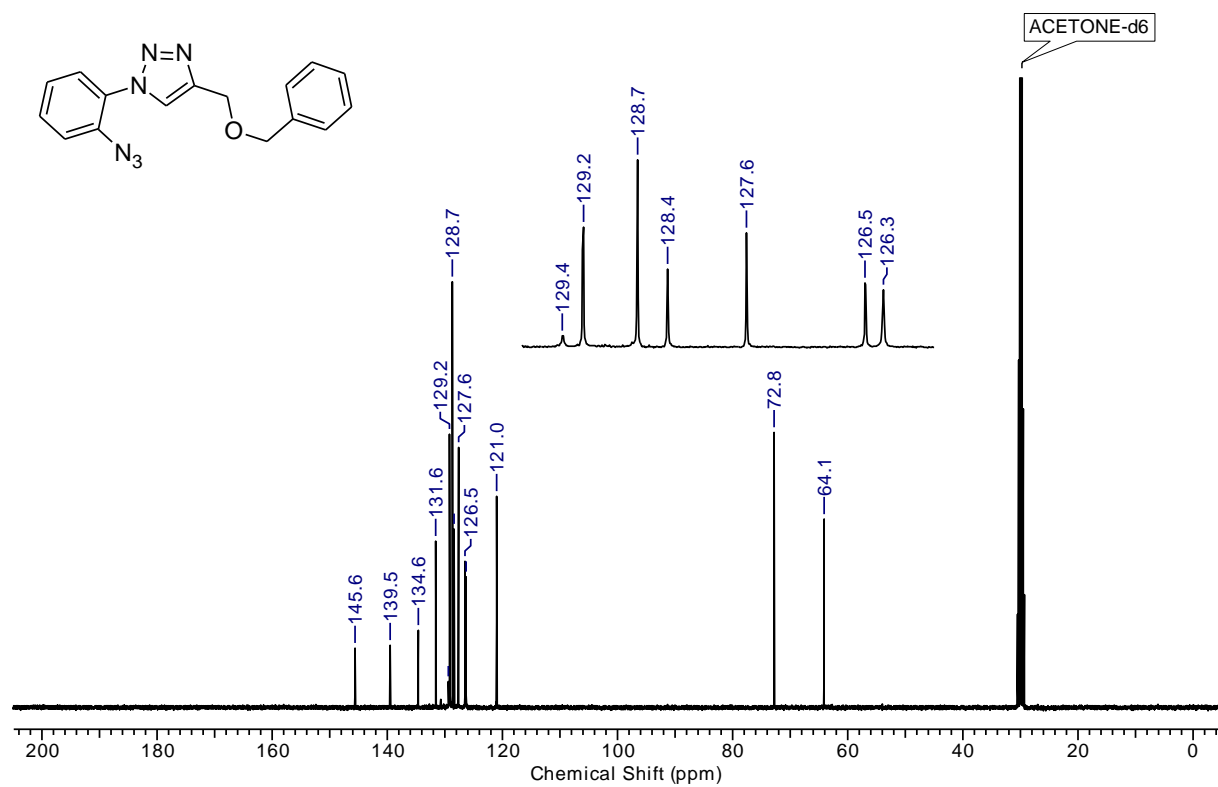

Fig. S20 <sup>13</sup>C NMR spectrum of 3c



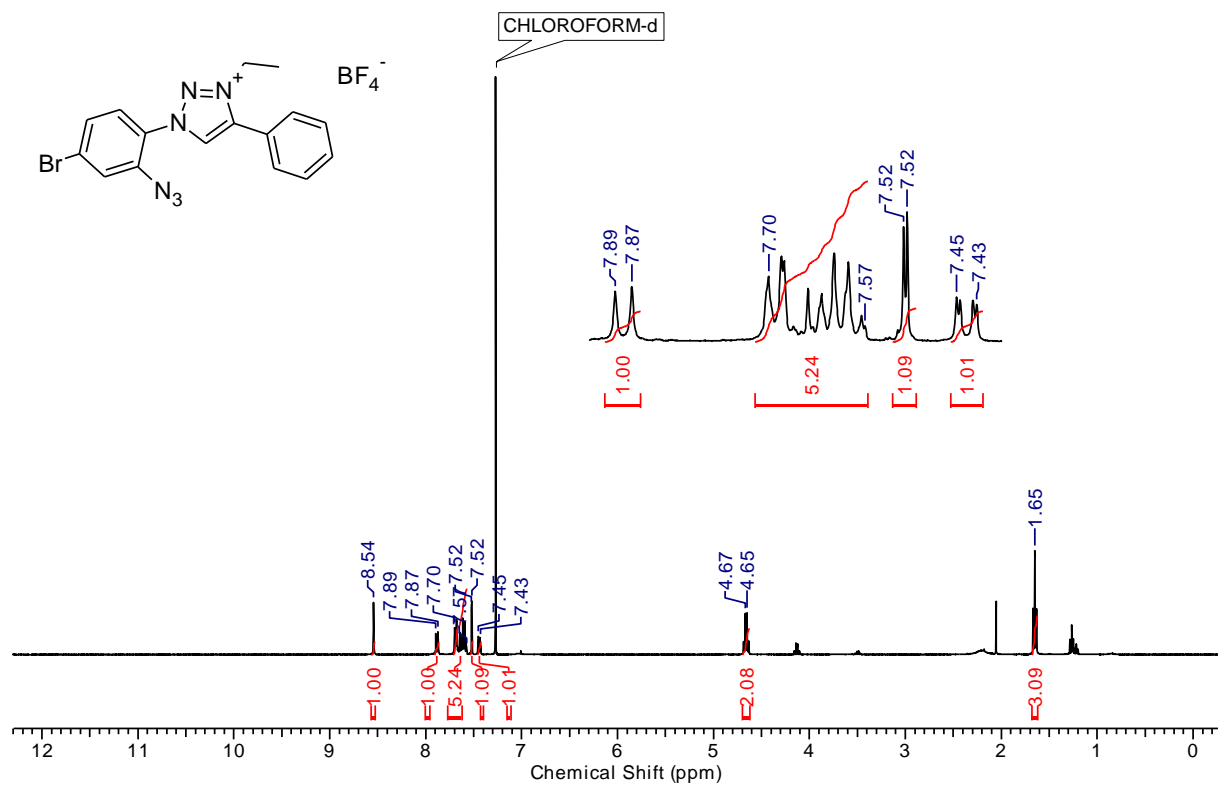

**Fig. S21** <sup>1</sup>H NMR spectrum of **4b**

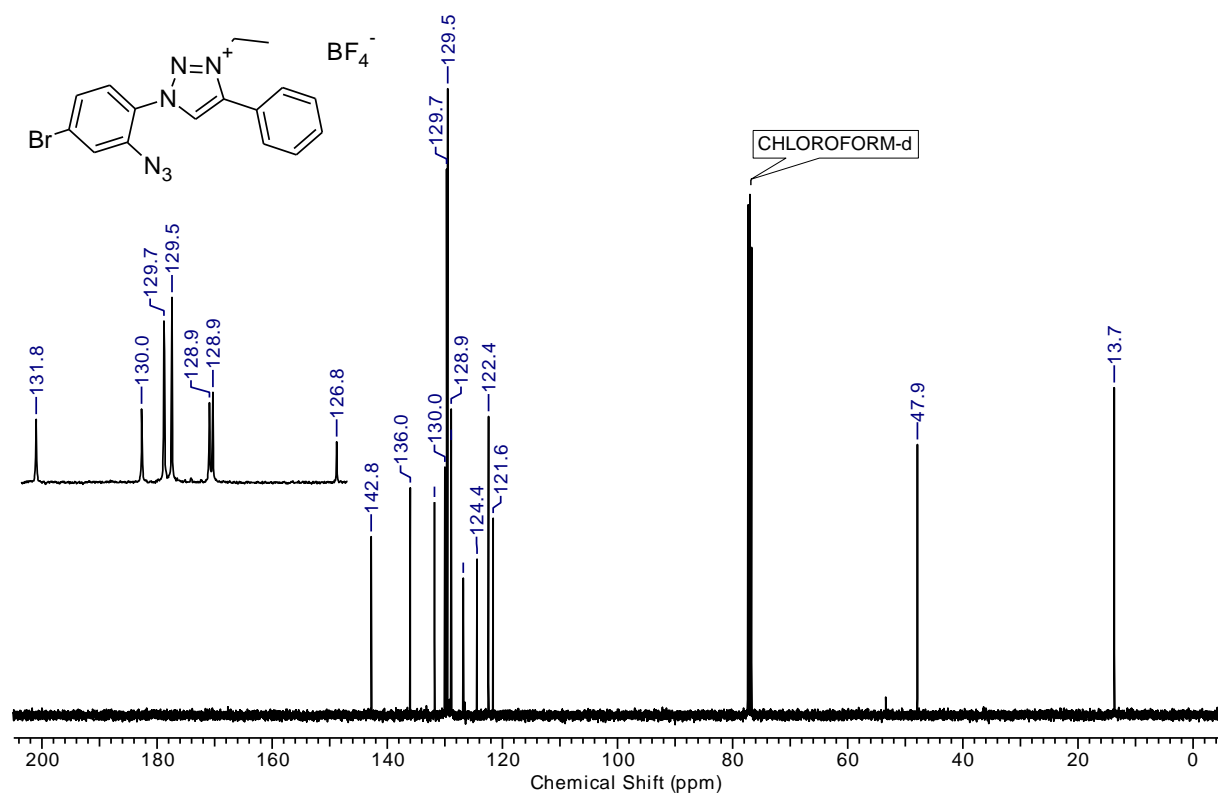

**Fig. S22** <sup>13</sup>C NMR spectrum of **4b**

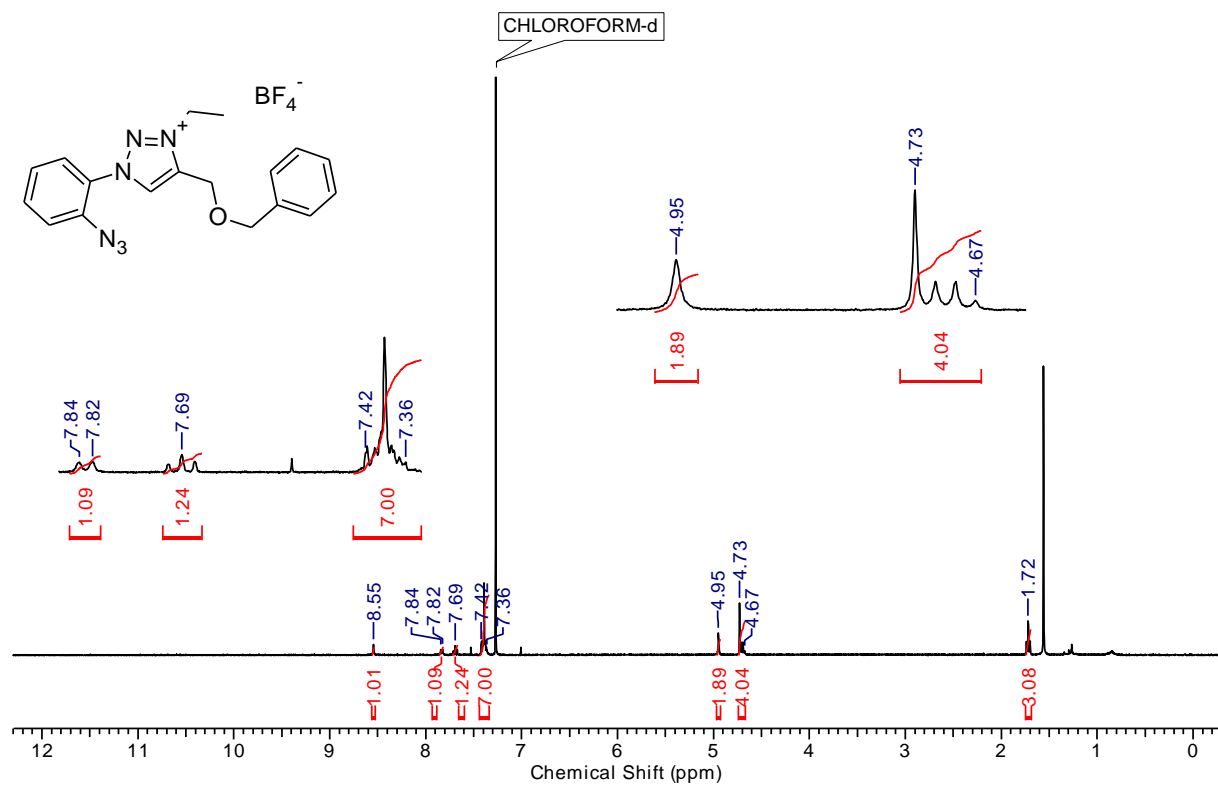

Fig. S23  $^1\text{H}$  NMR spectrum of 4c

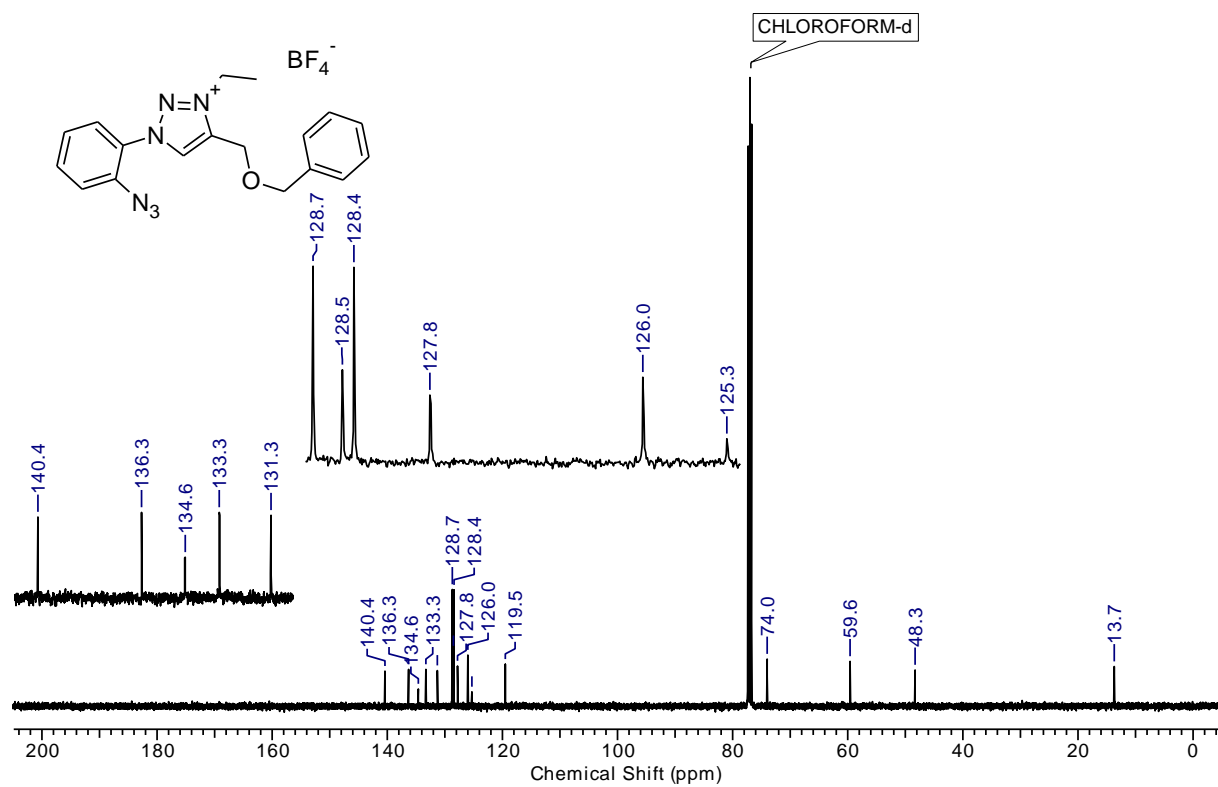

Fig. S24  $^{13}\text{C}$  NMR spectrum of 4c

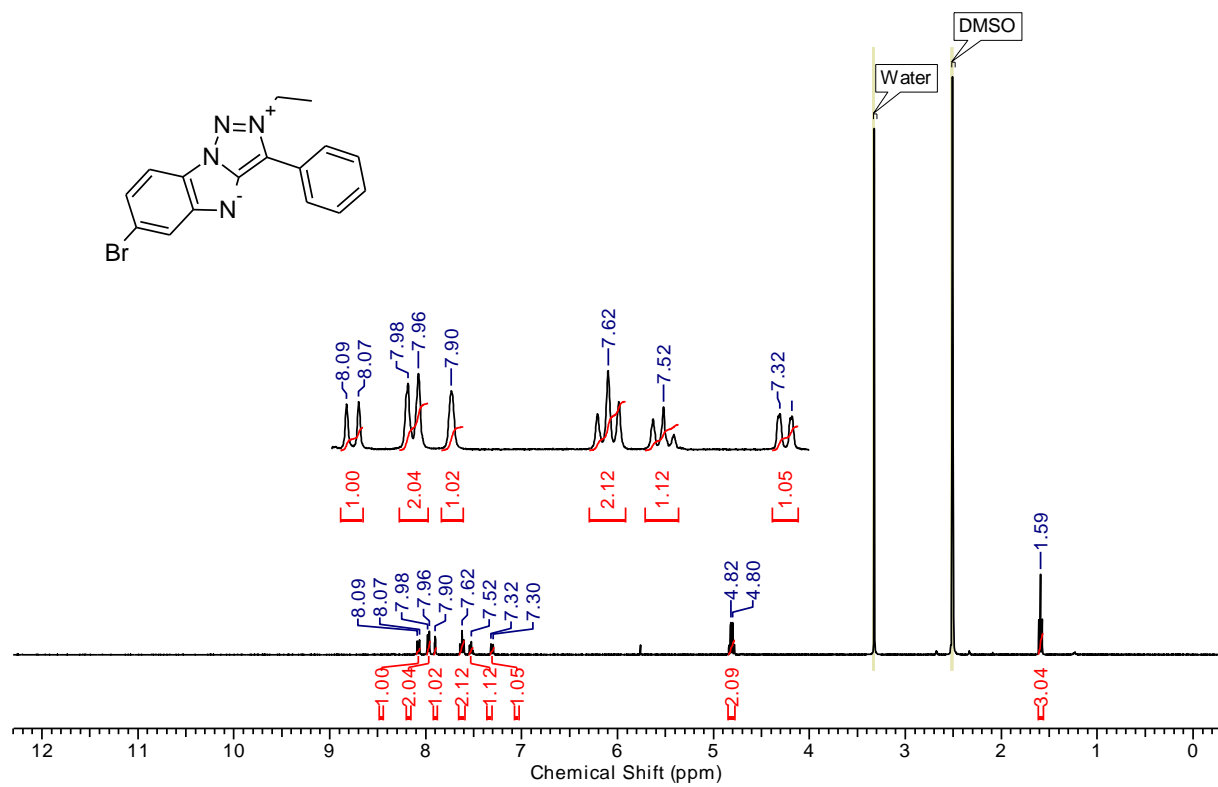

**Fig. S25**  $^1\text{H}$  NMR spectrum of **5b**

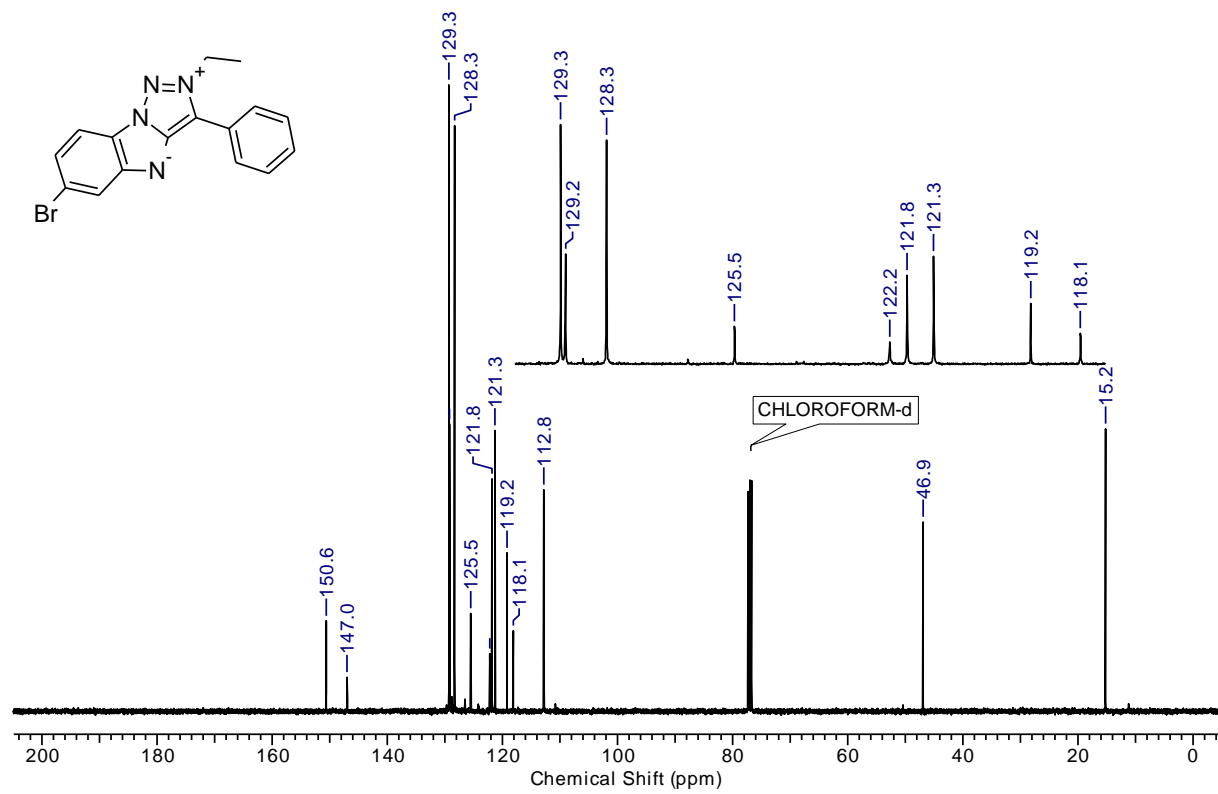

**Fig. S26**  $^{13}\text{C}$  NMR spectrum of **5b**

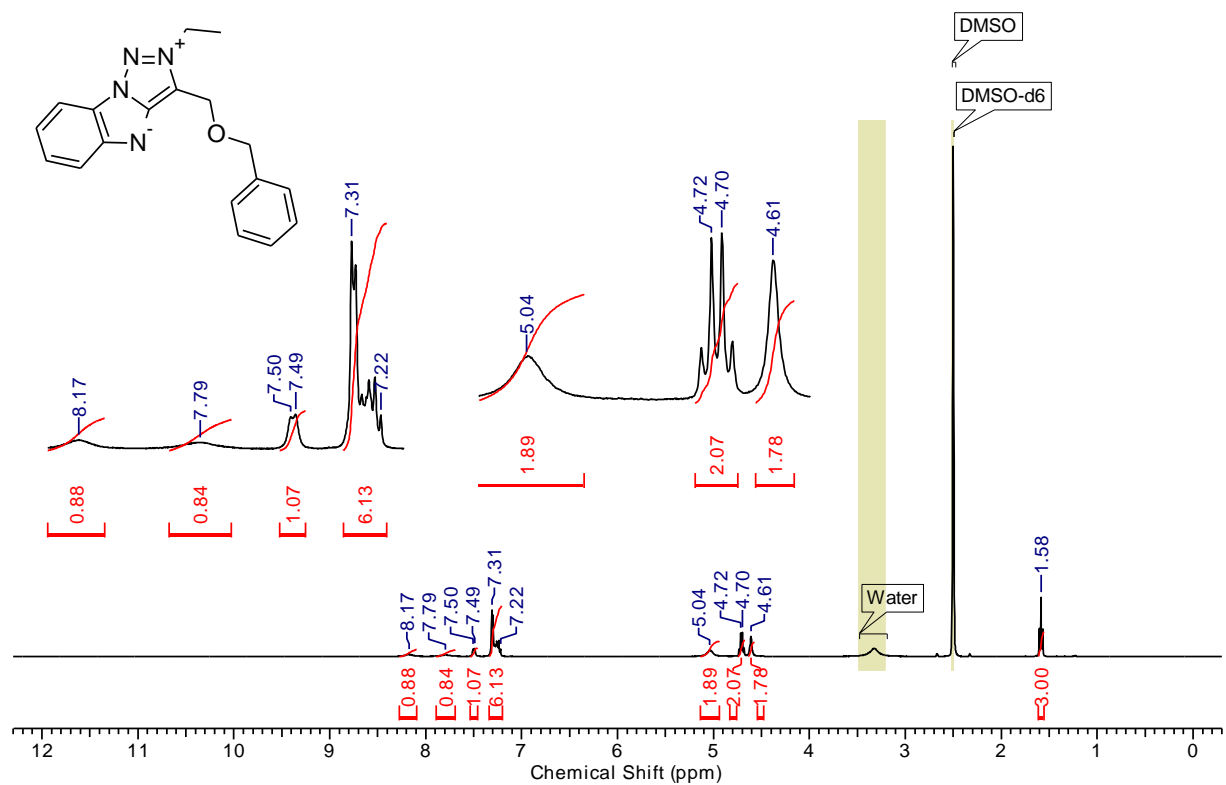

**Fig. S27** <sup>1</sup>H NMR spectrum of **5c**

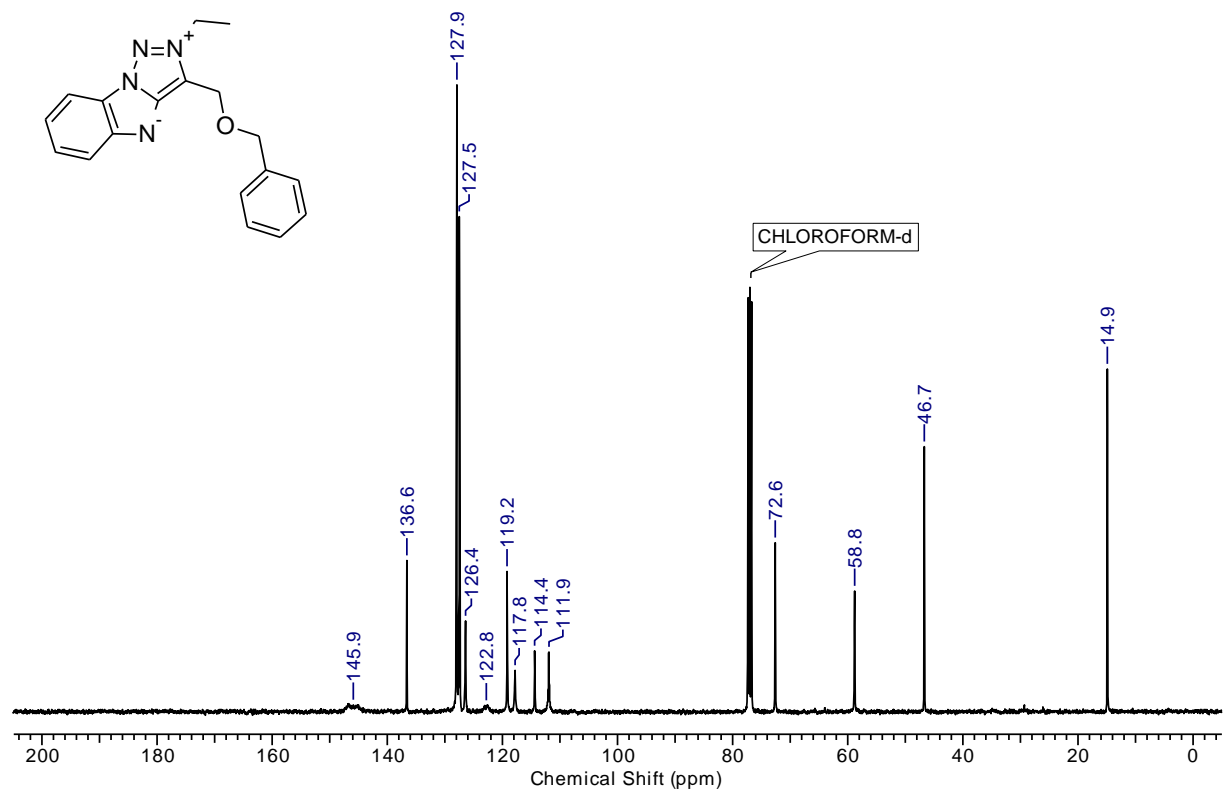

**Fig. S28** <sup>13</sup>C NMR spectrum of **5c**

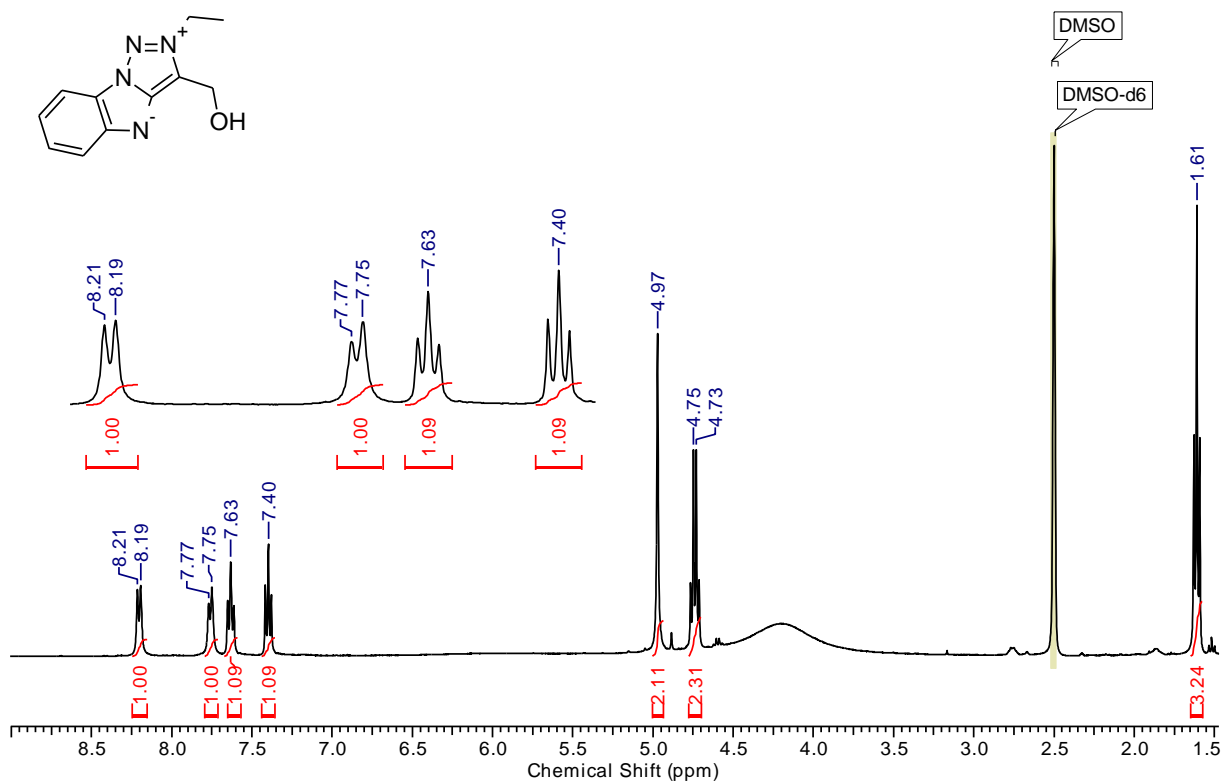

**Fig. S29** <sup>1</sup>H NMR spectrum of **5d**

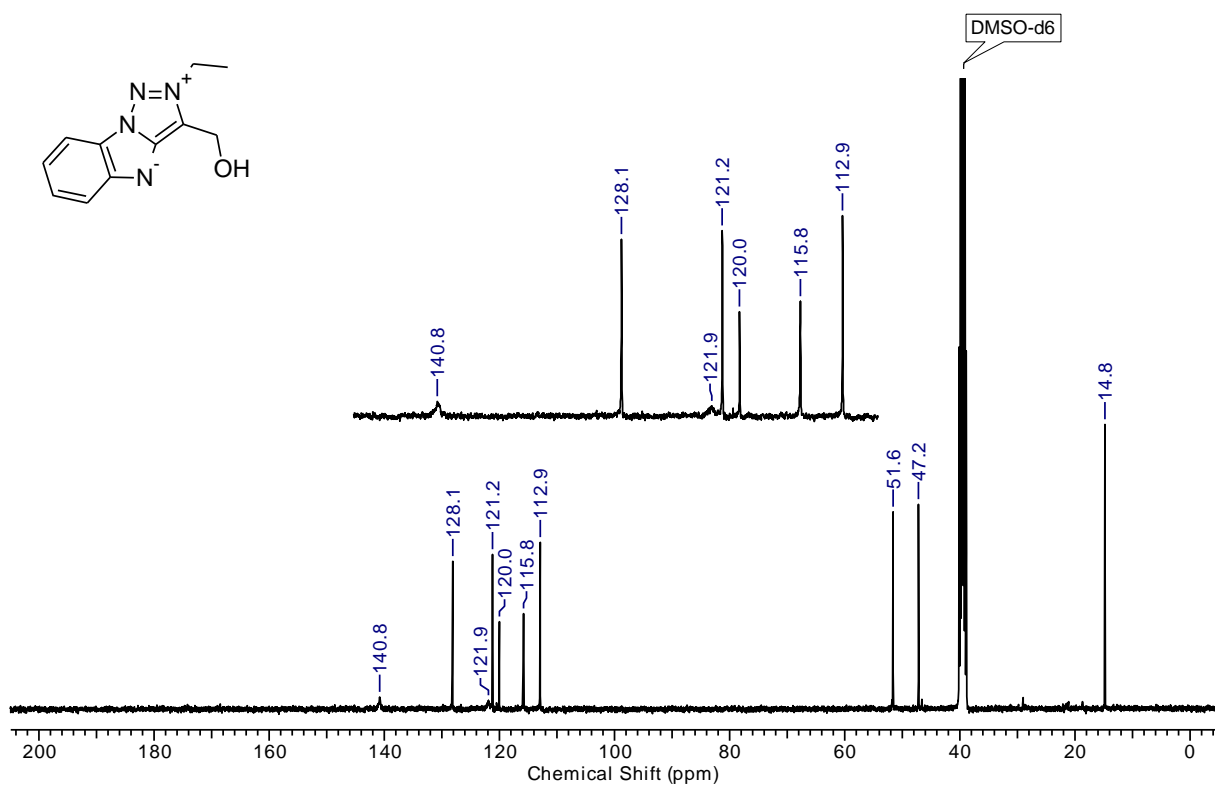

**Fig. S30** <sup>13</sup>C NMR spectrum of **5d**

**SI 7.      *xyz coordinates for 5a,b,d***

**5a**

|     | X         | Y         | Z         |
|-----|-----------|-----------|-----------|
| 1N  | 1.310121  | 0.758025  | -0.149530 |
| 2N  | -0.608840 | 1.563249  | -0.321280 |
| 3N  | 0.684279  | 1.923952  | -0.349561 |
| 4N  | 1.097539  | -1.489377 | 0.172386  |
| 5H  | -2.487807 | 2.171555  | -0.948272 |
| 6H  | -1.144771 | 3.219975  | -1.418231 |
| 7H  | -2.221422 | 2.975652  | 1.464800  |
| 8H  | -2.525970 | 4.325220  | 0.353976  |
| 9H  | -0.880497 | 4.009393  | 0.940022  |
| 10C | -1.569429 | 2.641213  | -0.594591 |
| 11C | -1.813167 | 3.538083  | 0.619682  |
| 12C | -0.837847 | 0.224404  | -0.112268 |
| 13C | 0.456673  | -0.336225 | -0.008741 |
| 14C | -2.120914 | -0.475044 | -0.045391 |
| 15C | 2.607602  | 0.290850  | -0.049267 |
| 16C | 2.426500  | -1.116746 | 0.150959  |
| 17C | 3.576545  | -1.917456 | 0.294626  |
| 18H | 3.474232  | -2.986845 | 0.448708  |
| 19C | 4.823308  | -1.307486 | 0.235843  |
| 20H | 5.716481  | -1.915856 | 0.346733  |
| 21C | 4.969194  | 0.086733  | 0.035949  |
| 22H | 5.964189  | 0.518927  | -0.003302 |
| 23C | 3.858009  | 0.910454  | -0.110246 |
| 24H | 3.954526  | 1.980164  | -0.264189 |
| 25C | -2.146458 | -1.828522 | -0.443870 |

|     |           |           |           |
|-----|-----------|-----------|-----------|
| 26H | -1.228244 | -2.298073 | -0.780721 |
| 27C | -3.330506 | -2.560851 | -0.392523 |
| 28H | -3.327868 | -3.600505 | -0.706498 |
| 29C | -4.513218 | -1.967355 | 0.059445  |
| 30H | -5.434875 | -2.540225 | 0.097625  |
| 31C | -4.495028 | -0.635097 | 0.478869  |
| 32H | -5.400728 | -0.170030 | 0.857340  |
| 33C | -3.311744 | 0.103365  | 0.436557  |
| 34H | -3.316057 | 1.117791  | 0.817705  |

**5b**

|     | X         | Y         | Z         |
|-----|-----------|-----------|-----------|
| 1N  | -0.231747 | 1.215217  | -0.197959 |
| 2N  | -2.283679 | 1.584470  | -0.292504 |
| 3N  | -1.102248 | 2.220169  | -0.345546 |
| 4N  | 0.063218  | -1.031347 | 0.061861  |
| 5H  | -4.271009 | 1.780024  | -0.845365 |
| 6H  | -3.206254 | 3.105234  | -1.328199 |
| 7H  | -4.099371 | 2.577201  | 1.579646  |
| 8H  | -4.730112 | 3.848032  | 0.514450  |
| 9H  | -3.035412 | 3.888582  | 1.040249  |
| 10C | -3.465350 | 2.432336  | -0.507439 |
| 11C | -3.854001 | 3.230849  | 0.737230  |
| 12C | -2.208311 | 0.223766  | -0.116800 |
| 13C | -0.820504 | -0.041329 | -0.066129 |
| 14C | -3.304925 | -0.741323 | -0.036734 |
| 15C | 1.137869  | 1.040573  | -0.148467 |
| 16C | 1.273900  | -0.376604 | 0.013954  |
| 17C | 2.570862  | -0.918860 | 0.103923  |

|      |           |           |           |
|------|-----------|-----------|-----------|
| 18H  | 2.714065  | -1.985369 | 0.229559  |
| 19C  | 3.638721  | -0.040139 | 0.027601  |
| 20Br | 5.414948  | -0.742644 | 0.147780  |
| 21C  | 3.491696  | 1.355784  | -0.134481 |
| 22H  | 4.371392  | 1.985882  | -0.186937 |
| 23C  | 2.222130  | 1.914916  | -0.224406 |
| 24H  | 2.085874  | 2.983956  | -0.348071 |
| 25C  | -3.048832 | -2.055599 | -0.481329 |
| 26H  | -2.063100 | -2.303923 | -0.860313 |
| 27C  | -4.043149 | -3.029741 | -0.423417 |
| 28H  | -3.825883 | -4.034557 | -0.773333 |
| 29C  | -5.310115 | -2.720917 | 0.080970  |
| 30H  | -6.083633 | -3.481747 | 0.123816  |
| 31C  | -5.567503 | -1.429446 | 0.546739  |
| 32H  | -6.539002 | -1.184488 | 0.966073  |
| 33C  | -4.574853 | -0.449876 | 0.498636  |
| 34H  | -4.785353 | 0.527823  | 0.916052  |

**5d**

|    | X         | Y         | Z         |
|----|-----------|-----------|-----------|
| 1N | -0.352234 | -0.526464 | -0.179346 |
| 2N | 1.715276  | -0.648130 | -0.411330 |
| 3N | 0.630398  | -1.426531 | -0.322808 |
| 4N | -0.906258 | 1.685693  | -0.035576 |
| 5H | 3.706200  | -0.611251 | -0.974608 |
| 6H | 2.874383  | -2.162973 | -1.191582 |
| 7H | 3.686548  | -0.928670 | 1.513518  |
| 8H | 4.503088  | -2.288036 | 0.711734  |
| 9H | 2.843834  | -2.487491 | 1.309756  |



|     |           |           |           |
|-----|-----------|-----------|-----------|
| 10C | 3.017557  | -1.320205 | -0.511247 |
| 11C | 3.541236  | -1.783100 | 0.848598  |
| 12C | 1.474923  | 0.694094  | -0.319362 |
| 13C | 0.082587  | 0.804024  | -0.164233 |
| 14C | 2.507550  | 1.760590  | -0.398720 |
| 15C | -1.728608 | -0.512791 | -0.048072 |
| 16C | -2.028915 | 0.887232  | 0.039470  |
| 17C | -3.379135 | 1.264261  | 0.182785  |
| 18H | -3.641203 | 2.315115  | 0.252263  |
| 19C | -4.347085 | 0.269225  | 0.231413  |
| 20H | -5.390646 | 0.550585  | 0.341362  |
| 21C | -4.017971 | -1.105198 | 0.142471  |
| 22H | -4.808834 | -1.847476 | 0.185804  |
| 23C | -2.697340 | -1.517883 | 0.001017  |
| 24H | -2.429830 | -2.567159 | -0.068271 |
| 25H | 3.051335  | 1.712244  | -1.354939 |
| 26H | 1.979143  | 2.719639  | -0.356735 |
| 27H | 4.020028  | 2.388108  | 0.700489  |
| 28O | 3.430861  | 1.621738  | 0.693738  |
